# Supplementary material for: Analysis of cardiac magnetic resonance imaging in 36,000 individuals yields genetic insights into dilated cardiomyopathy
Source: PubMed Central journal article supplement (PMC7206184; doi:10.1038/s41467-020-15823-7), 2020-05-07
Supplement: 41467_2020_15823_MOESM1_ESM.pdf [file 41467_2020_15823_MOESM1_ESM.pdf]

# Supplementary Information

Pirruccello, *et al*, “Analysis of cardiac magnetic resonance imaging in 36,000 individuals yields genetic insights into dilated cardiomyopathy”

## Supplementary Index

|                                                                                                            |          |
|------------------------------------------------------------------------------------------------------------|----------|
| <b>Supplementary Index</b>                                                                                 | <b>1</b> |
| <b>Supplementary Notes</b>                                                                                 | <b>3</b> |
| Supplementary Notes 1: Sensitivity analysis in Europeans                                                   | 3        |
| <b>Supplementary Methods</b>                                                                               | <b>4</b> |
| Sensitivity analysis in Europeans                                                                          | 4        |
| MESA cardiac magnetic resonance imaging                                                                    | 5        |
| MESA whole genome sequencing                                                                               | 6        |
| <b>Supplementary Tables</b>                                                                                | <b>6</b> |
| Supplementary Table 1: Loci significant at various P value thresholds                                      | 6        |
| Supplementary Table 2: LD score regression                                                                 | 6        |
| Supplementary Table 3: Lookup of SNPs from prior GWAS studies in the cardiac MRI GWAS                      | 7        |
| Supplementary Table 4: Characteristics of MESA Participants                                                | 8        |
| Supplementary Table 5: Genes in cardiomyopathy panels                                                      | 9        |
| Supplementary Table 6: Colocation with Mendelian cardiomyopathy genes                                      | 10       |
| Supplementary Table 7: PheWAS results for curated disease phenotypes                                       | 10       |
| Supplementary Table 8: Characteristics of unrelated participants who did not undergo cardiac MRI           | 11       |
| Supplementary Table 9: Polygenic scores from cardiac MRI phenotypes are associated with incident DCM       | 13       |
| Supplementary Table 10: Characteristics of TTNtv carriers                                                  | 13       |
| Supplementary Table 11: Imputed TTNtv were not confirmed by exome sequencing                               | 14       |
| Supplementary Table 12: Clinical characteristics of European UK Biobank participants with cardiac MRI data | 14       |
| Supplementary Table 13: Heritability in the full sample and in the European-specific subset                | 16       |
| Supplementary Table 14: LD score regression in the European-specific analysis                              | 16       |
| Supplementary Table 15: Loci significant at various P value thresholds in the European-specific analysis   | 17       |

|                                                                                                                                           |           |
|-------------------------------------------------------------------------------------------------------------------------------------------|-----------|
| Supplementary Table 16: Loci newly achieving genome-wide significance in the European-specific analysis                                   | 17        |
| Supplementary Table 17: Concordance of effect estimates from lead SNPs in the main analysis and the European-specific analysis            | 18        |
| Supplementary Table 18: Directional concordance of genome-wide significant SNPs from the main analysis and the European-specific analysis | 20        |
| Supplementary Table 19: Characteristics of unrelated European participants who did not undergo cardiac MRI                                | 20        |
| Supplementary Table 20: Polygenic scores from cardiac MRI phenotypes are associated with incident DCM in the European-specific analysis   | 21        |
| <b>Supplementary Figures</b>                                                                                                              | <b>22</b> |
| Supplementary Figure 1: Flow diagram for UK Biobank GWAS participants                                                                     | 22        |
| Supplementary Figure 2: Sex-stratified distributions of cardiac MRI phenotypes                                                            | 23        |
| Supplementary Figure 3: Cross-trait correlation                                                                                           | 24        |
| Supplementary Figure 4: Genetic correlation                                                                                               | 25        |
| Supplementary Figure 5: MAGMA gene expression enrichment                                                                                  | 26        |
| LVEDV                                                                                                                                     | 26        |
| LVESV                                                                                                                                     | 27        |
| LVEF                                                                                                                                      | 27        |
| SV                                                                                                                                        | 28        |
| LVEDVi                                                                                                                                    | 28        |
| LVESVi                                                                                                                                    | 29        |
| SVi                                                                                                                                       | 29        |
| Supplementary Figure 6: GWAS loci are found nearby to more cardiomyopathy-related genes than expected by chance                           | 30        |
| Supplementary Figure 7: PheWAS                                                                                                            | 32        |
| Supplementary Figure 8: SNP effect estimates in the main analysis and in the European-specific analysis                                   | 35        |
| <b>Supplementary References</b>                                                                                                           | <b>36</b> |

# Supplementary Notes

## Supplementary Notes 1: Sensitivity analysis in Europeans

Because we ran BOLT with the default European linkage disequilibrium panel for the main analyses, we also conducted sensitivity analyses using a subset of rigorously-defined European samples to understand whether our results were influenced by residual population stratification. To do this, we defined a genetically similar subset of participants who self-described as British, Irish, or another European ancestry and underwent cardiac MRI (N = 32,755, 9% fewer samples than in the main analysis). The characteristics of these participants are described in **Supplementary Table 12**.

The heritability estimates for each cardiac trait in the European-specific analysis were similar to those in the main analysis (**Supplementary Table 13**). The GWAS in Europeans showed similar evidence for polygenicity, and lack of confounding, as were observed in the main analysis (**Supplementary Table 14**).

Eight fewer loci achieved genome-wide significance in the European-specific analysis (49 distinct loci instead of 57 in the main analysis, or fewer loci with more stringent P value thresholds as in **Supplementary Table 15**). Four loci newly achieved genome-wide significance in the European-specific analysis (**Supplementary Table 16**). These include loci near *ARPC1A*, whose gene product is actin related protein 2/3 complex subunit 1A; *PDGFD*, whose gene product is platelet derived growth factor D; *LSM7*; and *LYN*. Twelve of the lead SNPs identified

in the main analysis with  $P < 5 \times 10^{-8}$  did not have  $P < 5 \times 10^{-8}$  in the European-specific analysis for any trait, although all SNPs with  $P < 5 \times 10^{-8}$  in the main analysis had association  $P < 3 \times 10^{-6}$  or stronger in the European-specific analysis. All lead SNPs from the main analysis are shown with their corresponding European-specific effect size and P value in **Supplementary Data File 6**.

Across various P value thresholds, the effect estimates for each SNP showed strong correlation with those in the main analysis, with nearly perfect correlation for all SNPs beyond  $P < 5 \times 10^{-6}$  (**Supplementary Table 17, Supplementary Figure 8**). Of the SNPs with  $P < 5 \times 10^{-8}$  in the main analysis, none had an effect in the opposite direction in the European-specific analysis (**Supplementary Table 18**).

Polygenic scores produced using the same procedure as in the main analysis yielded similar hazard ratios (participant characteristics in **Supplementary Table 19** and results in **Supplementary Table 20**). The best performing score, derived from the LVESVi lead SNPs, yielded an HR of 1.56 for incident dilated cardiomyopathy in the European-only subset, similar to the HR of 1.58 from the polygenic score produced in the main analysis.

## Supplementary Methods

### Sensitivity analysis in Europeans

Starting with participants in the UK Biobank who self-identified as British, Irish, or Other European, we applied the *aberrant* R package as previously described<sup>1,2</sup>. Briefly, we used the first 6 principal components (PCs) of ancestry in pairs (PC 1 and 2; PC 3 and 4; PC 5 and 6)

with lambda (the ratio of standard deviations of outliers vs inliers) set to 40. We took the intersection of these 3 pairs, isolating a tight genetic inlier cluster of European participants.

For each trait, we then conducted a heritability analysis with BOLT-REML and a GWAS with BOLT-LMM. Using the lead SNPs from this smaller European sample, we produced polygenic scores and applied them in the European subset of the remaining unrelated UK Biobank participants who had not undergone cardiac MRI. Aside from using this genetically defined subset of European participants, all analyses were conducted in the same fashion and with the same settings as in the main analysis.

To evaluate the SNP-level differences in the GWAS, we compared effect estimates (Beta) for each SNP in the main analysis with those in the European-specific analysis using a linear model. Taking SNPs below a given P value threshold in the main analysis, agreement was assessed by the overall model fit ( $r^2$ ). This procedure was performed for each trait across several P value thresholds.

## MESA cardiac magnetic resonance imaging

MESA is a longitudinal cohort study of cardiovascular disease in 6,814 participants aged 44-84 years at enrollment and recruited in six US sites. A baseline examination was held from 2000-2002 and follow up exams from 2002 – 2012<sup>3</sup>. Cardiovascular MRI was performed on 5,004 participants at baseline and 3,015 during a follow-up examination (“Exam 5”). The MRI protocol during Exam 5 used a similar technique (steady-state free precession) to that used in the UK Biobank, and was therefore chosen for comparison against the same 7 traits in the main analysis.

## MESA whole genome sequencing

Whole genome sequencing and quality control of the MESA participants was described previously<sup>4</sup>. In brief, ~4,610 MESA participants were chosen for whole genome sequencing at the Broad Institute (Cambridge, MA), with written consent and IRB approval (IRB #2016P001308). Sequencing was performed on Illumina HiSeqX platform with 151-bp paired-end reads. Samples were excluded from downstream variant calling if the estimated contamination was  $\geq 3\%$  or  $<95\%$  of the genome was covered to at least 10x read depth. Variants were called with GATK version 3 HaplotypeCaller<sup>5</sup>.

## Supplementary Tables

### Supplementary Table 1: Loci significant at various P value thresholds

| P threshold | LVEDV | LVEDVi | LVESV | LVESVi | LVEF | SV | SVi | Total distinct loci |
|-------------|-------|--------|-------|--------|------|----|-----|---------------------|
| 5.00E-08    | 22    | 14     | 22    | 32     | 28   | 12 | 8   | 57                  |
| 1.00E-08    | 17    | 7      | 15    | 23     | 21   | 9  | 5   | 37                  |
| 5.00E-09    | 17    | 7      | 15    | 21     | 19   | 9  | 3   | 36                  |
| 1.00E-09    | 14    | 5      | 14    | 17     | 15   | 5  | 2   | 28                  |

“P threshold” represents the P value cutoff. “Total distinct loci” is a count of unique loci

aggregated across all traits, so that any locus found in two or more traits is only counted once.

### Supplementary Table 2: LD score regression

|        | Lambda | Intercept |
|--------|--------|-----------|
| LVEDV  | 1.1459 | 1.0187    |
| LVEDVi | 1.1459 | 0.9976    |
| LVESV  | 1.1459 | 1.0078    |

|               |        |        |
|---------------|--------|--------|
| <b>LVESVi</b> | 1.1459 | 0.9917 |
| <b>LVEF</b>   | 1.0957 | 0.9952 |
| <b>SV</b>     | 1.1459 | 1.0204 |
| <b>SVi</b>    | 1.0957 | 1.0067 |

Lambda represents the genomic inflation factor. Intercept represents the intercept from LD score regression.

### Supplementary Table 3: Lookup of SNPs from prior GWAS studies in the cardiac MRI GWAS

| Study     | Discovery Trait       | SNP         | CHR | BP_HG19    | Nearby Genes  | Locus  | Discovery P | MRI Trait | MRI GWAS P            |
|-----------|-----------------------|-------------|-----|------------|---------------|--------|-------------|-----------|-----------------------|
| Kanai     | LVIDd                 | rs34866937  | 8   | 125859850  | MTSS1         | TTE 1  | 1.77E-09    | LVEDV     | 6.20E-11              |
| Kanai     | LVIDd                 | rs3812625   | 10  | 75757702   | VCL           | TTE 2  | 1.42E-08    | LVEDV     | 6.00E-01              |
| Kanai     | LVIDd                 | rs11874741  | 18  | 30077859   | GAREM1        | TTE 3  | 4.94E-08    | LVEDV     | 9.70E-01              |
| Kanai     | LVIDs                 | rs6546120   | 2   | 65238407   | SLC1A4        | TTE 4  | 4.79E-08    | LVESV     | 4.90E-01              |
| Kanai     | LVIDs                 | rs34866937  | 8   | 125859850  | MTSS1         | TTE 1  | 1.60E-13    | LVESV     | 8.70E-13              |
| Kanai     | LVIDs                 | rs11874741  | 18  | 30077859   | GAREM1        | TTE 3  | 4.62E-08    | LVESV     | 9.90E-01              |
| Kanai     | LVIDs                 | rs5760061   | 22  | 24178279   | SMARCB1/DERL3 | TTE 5  | 8.63E-11    | LVESV     | 1.30E-13              |
| Kanai     | Fractional Shortening | rs6546120   | 2   | 65238407   | SLC1A4        | TTE 4  | 1.70E-08    | LVEF      | 7.20E-01              |
| Kanai     | Fractional Shortening | rs34866937  | 8   | 125859850  | MTSS1         | TTE 1  | 2.40E-13    | LVEF      | 1.40E-07              |
| Kanai     | Fractional Shortening | rs11025521  | 11  | 20370206   | DBX1          | TTE 6  | 4.41E-08    | LVEF      | 6.80E-02              |
| Kanai     | Fractional Shortening | rs5760054   | 22  | 24161717   | SMARCB1/DERL3 | TTE 5  | 1.01E-11    | LVEF      | 2.70E-13              |
| Kanai     | Ejection Fraction     | rs6546120   | 2   | 65238407   | SLC1A4        | TTE 4  | 3.35E-08    | LVEF      | 7.20E-01              |
| Kanai     | Ejection Fraction     | rs34866937  | 8   | 125859850  | MTSS1         | TTE 1  | 8.97E-16    | LVEF      | 1.40E-07              |
| Kanai     | Ejection Fraction     | rs5760061   | 22  | 24178279   | SMARCB1/DERL3 | TTE 5  | 6.84E-11    | LVEF      | 2.80E-13              |
| Wild      | LVIDd                 | rs11153730  | 6   | 118667522  | SLC35F1/PLN   | TTE 7  | 6.40E-16    | LVEDV     | 3.70E-16              |
| Wild      | LVIDd                 | rs12541595  | 8   | 125857359  | MTSS1         | TTE 1  | 3.02E-12    | LVEDV     | 1.80E-10              |
| Wild      | LVIDd                 | rs10774625  | 12  | 111910219  | ATXN2         | TTE 8  | 1.90E-08    | LVEDV     | 1.70E-15              |
| Wild      | Fractional Shortening | rs9470361   | 6   | 36623379   | CDKN1A        | TTE 9  | 5.30E-09    | LVEF      | 2.00E-15              |
| Wild      | LV Mass               | rs1454157   | 4   | 177358798  | SPCS3         | TTE 10 | 4.41E-09    |           |                       |
| Esslinger | DCM                   | rs10927875  | 1   | 16299312   | CLCNKA        | DCM 1  | 8.11E-13    | LVEF      | 3.10E-21              |
| Esslinger | DCM                   | rs848210    | 1   | 16259813   | CLCNKA        | DCM 1  | 6.30E-07    | LVEF      | 4.30E-20              |
| Esslinger | DCM                   | rs3829746   | 2   | 2179427536 | TTN           | DCM 2  | 3.40E-07    | LVESV     | 2.30E-19              |
| Esslinger | DCM                   | rs13107325  | 4   | 103188709  | SLC39A8       | DCM 3  | 6.00E-07    | LVESV     | 1.10E-04              |
| Esslinger | DCM                   | rs4712056   | 6   | 53989526   | MLIP          | DCM 4  | 5.10E-07    | LVEDV     | 1.50E-06              |
| Esslinger | DCM                   | rs2291569   | 7   | 128488734  | FLNC          | DCM 5  | 8.70E-11    | LVESV     | 2.80E-10              |
| Esslinger | DCM                   | rs2234962   | 10  | 121429633  | BAG3          | DCM 6  | 1.70E-25    | LVESV     | 1.80E-30              |
| Esslinger | DCM                   | rs3188055   | 10  | 121586882  | BAG3          | DCM 6  | 1.10E-08    | LVEF      | 8.60E-06              |
| Esslinger | DCM                   | rs1051168   | 15  | 85200520   | ALPK3         | DCM 7  | 4.10E-07    | LVESVi    | 6.90E-10              |
| Esslinger | DCM                   | rs3803403   | 15  | 85383145   | ALPK3         | DCM 7  | 2.90E-07    | LVESV     | 1.20E-11              |
| Esslinger | DCM                   | rs2303510   | 18  | 34324091   | FHOD3         | DCM 8  | 1.50E-07    | LVEF      | 6.10E-06 <sup>a</sup> |
| Meder     | DCM                   | rs9262636   | 6   | 31025848   | HCG22         | DCM 9  | 4.90E-09    | LVEDVi    | 4.30E-01              |
| Villard   | DCM                   | rs10927875  | 1   | 16299312   | CLCNKA        | DCM 1  | 1.30E-07    | LVEF      | 3.10E-21              |
| Villard   | DCM                   | rs2234962   | 10  | 121429633  | BAG3          | DCM 6  | 8.80E-10    | LVEF      | 5.40E-31              |
| Aung      | LVEDV                 | rs2042995   | 2   | 2179558366 | TTN           | AUN 1  | 2.30E-11    | LVEDV     | 1.50E-14              |
| Aung      | LVEDV                 | rs7071853   | 10  | 121311606  | BAG3          | AUN 2  | 3.90E-09    | LVEDV     | 1.70E-05              |
| Aung      | LVEDV                 | rs7310615   | 12  | 111865049  | SH2B3         | AUN 3  | 1.40E-09    | LVEDV     | 4.90E-16              |
| Aung      | LVESV                 | rs2042995   | 2   | 2179558366 | TTN           | AUN 4  | 8.40E-20    | LVESV     | 5.90E-23              |
| Aung      | LVESV                 | rs200712209 | 8   | 125858538  | MTSS1         | AUN 5  | 1.70E-11    | LVESV     | 2.70E-13              |
| Aung      | LVESV                 | rs72840788  | 10  | 121415685  | BAG3          | AUN 6  | 5.60E-17    | LVESV     | 8.10E-32              |
| Aung      | LVEF                  | rs945425    | 1   | 16348412   | CLCNKA        | AUN 7  | 8.60E-11    | LVEF      | 6.00E-25              |
| Aung      | LVEF                  | rs2042995   | 2   | 2179558366 | TTN           | AUN 8  | 2.50E-12    | LVEF      | 1.30E-18              |
| Aung      | LVEF                  | rs34866937  | 8   | 125859850  | MTSS1         | AUN 9  | 6.80E-11    | LVEF      | 1.40E-07              |

|      |                      |             |    |           |              |        |          |      |          |
|------|----------------------|-------------|----|-----------|--------------|--------|----------|------|----------|
| Aung | LVEF                 | rs72840788  | 10 | 121415685 | BAG3         | AUN 10 | 3.40E-15 | LVEF | 4.00E-32 |
| Aung | LV Mass              | rs2255167   | 2  | 179558282 | TTN          | AUN 11 | 8.30E-14 |      |          |
| Aung | LV Mass-Volume Ratio | rs146170154 | 6  | 36646768  | CDKN1A       | AUN 12 | 2.60E-11 |      |          |
| Aung | LV Mass-Volume Ratio | rs149369954 | 15 | 85348961  | ZNF592/ALPK3 | AUN 13 | 1.90E-11 |      |          |
| Aung | LV Mass-Volume Ratio | rs6003909   | 22 | 24181652  | DERL3        | AUN 14 | 9.70E-15 |      |          |

Study: The discovery study in which the SNPs were identified: Kanai, Wild, Esslinger, Meder, Villard, Aung<sup>6-11</sup>. LVIDd: left ventricular internal diameter at end diastole from transthoracic echocardiography (TTE). LVIDs: left ventricular diameter at end systole from TTE. LV Mass: left ventricular mass from TTE. DCM: dilated cardiomyopathy. The “Locus” column tracks unique genomic loci, such that, within a study type (TTE or DCM), SNPs within 1 megabase of one another are given the same Locus identifier. For SNPs from the studies of cardiac traits, the most similar MRI trait was used for comparison. No similar trait was available for comparison to LV Mass. For SNPs from the DCM GWAS studies, the MRI trait with the lowest P-value was taken for each SNP. The “MRI GWAS P” column represents the association P value of the SNP from the SNP column within in the cardiac MRI GWAS from the “MRI Trait” column. The MRI GWAS P value column is shaded blue if the SNP had  $P < 5 \times 10^{-8}$  in the MRI GWAS, and yellow if the SNP had  $5 \times 10^{-8} < P < 1 \times 10^{-3}$ . The values represent the P value for the specific SNP, but other SNPs in linkage disequilibrium may have stronger association P values. Note: (a) At rs2303510 (DCM 8), the nearby SNP rs2047273 ( $r^2 = 0.29$ ) in the locus had an association  $P = 3.1 \times 10^{-8}$  with LVEDV. After accounting for SNPs in linkage disequilibrium, five of the 10 TTE loci and six of the nine DCM loci have a genome-wide significant SNP in the cardiac MRI GWAS.

## Supplementary Table 4: Characteristics of MESA Participants

|                                |                  | Women        | Men          | All          |
|--------------------------------|------------------|--------------|--------------|--------------|
|                                |                  | 1204         | 980          | 2184         |
| <b>Age at MRI</b>              |                  |              |              |              |
|                                | Mean (SD)        | 69 (9.1)     | 68 (8.9)     | 69 (9.1)     |
|                                | Median [Q1-Q3]   | 68 [61 - 76] | 67 [61 - 75] | 68 [61 - 75] |
|                                | Missing          | 5 (0.4%)     | 3 (0.3%)     | 8 (0.4%)     |
| <b>Site</b>                    |                  |              |              |              |
|                                | Wake Forest      | 197 (16 %)   | 135 (14 %)   | 332 (15 %)   |
|                                | Columbia         | 200 (17 %)   | 165 (17 %)   | 365 (17 %)   |
|                                | Johns Hopkins    | 181 (15 %)   | 127 (13 %)   | 308 (14 %)   |
|                                | Minnesota        | 173 (14 %)   | 160 (16 %)   | 333 (15 %)   |
|                                | Northwestern     | 243 (20 %)   | 186 (19 %)   | 429 (20 %)   |
|                                | UCLA             | 210 (17 %)   | 207 (21 %)   | 417 (19 %)   |
| <b>Ancestry</b>                |                  |              |              |              |
|                                | European         | 537 (45 %)   | 403 (41 %)   | 940 (43 %)   |
|                                | East Asian       | 156 (13 %)   | 143 (15 %)   | 299 (14 %)   |
|                                | African-American | 297 (25 %)   | 210 (21 %)   | 507 (23 %)   |
|                                | Hispanic         | 214 (18 %)   | 224 (23 %)   | 438 (20 %)   |
| <b>BMI (kg/cm<sup>2</sup>)</b> |                  |              |              |              |
|                                | Mean (SD)        | 28 (5.4)     | 27 (4.0)     | 28 (4.8)     |
|                                | Median [Q1-Q3]   | 27 [24 - 31] | 27 [25 - 30] | 27 [24 - 30] |
| <b>Weight (kg)</b>             |                  |              |              |              |



|                    |                |                 |                 |                 |
|--------------------|----------------|-----------------|-----------------|-----------------|
|                    | Mean (SD)      | 72 (15)         | 83 (14)         | 77 (16)         |
|                    | Median [Q1-Q3] | 69 [61 - 81]    | 83 [73 - 92]    | 75 [65 - 87]    |
| <b>Height (cm)</b> |                |                 |                 |                 |
|                    | Mean (SD)      | 160 (6.8)       | 170 (7.6)       | 170 (9.7)       |
|                    | Median [Q1-Q3] | 160 [160 - 170] | 170 [170 - 180] | 170 [160 - 170] |
| <b>LVEDV</b>       |                |                 |                 |                 |
|                    | Mean (SD)      | 110 (23)        | 130 (32)        | 120 (31)        |
|                    | Median [Q1-Q3] | 100 [90 - 120]  | 130 [110 - 150] | 110 [96 - 140]  |
| <b>LVEDVi</b>      |                |                 |                 |                 |
|                    | Mean (SD)      | 59 (11)         | 67 (14)         | 63 (13)         |
|                    | Median [Q1-Q3] | 59 [52 - 66]    | 66 [57 - 76]    | 62 [54 - 70]    |
| <b>LVESV</b>       |                |                 |                 |                 |
|                    | Mean (SD)      | 38 (12)         | 54 (18)         | 45 (17)         |
|                    | Median [Q1-Q3] | 36 [30 - 45]    | 51 [41 - 63]    | 42 [33 - 54]    |
| <b>LVESVi</b>      |                |                 |                 |                 |
|                    | Mean (SD)      | 21 (6.0)        | 27 (8.1)        | 24 (7.5)        |
|                    | Median [Q1-Q3] | 21 [17 - 25]    | 26 [21 - 31]    | 23 [19 - 28]    |
| <b>LVEF</b>        |                |                 |                 |                 |
|                    | Mean (SD)      | 64 (6.6)        | 60 (6.7)        | 62 (7.0)        |
|                    | Median [Q1-Q3] | 65 [60 - 69]    | 60 [56 - 65]    | 63 [58 - 67]    |
| <b>SV</b>          |                |                 |                 |                 |
|                    | Mean (SD)      | 67 (15)         | 80 (19)         | 73 (18)         |
|                    | Median [Q1-Q3] | 67 [57 - 76]    | 78 [66 - 93]    | 71 [61 - 84]    |
| <b>SVi</b>         |                |                 |                 |                 |
|                    | Mean (SD)      | 38 (7.5)        | 40 (9.1)        | 39 (8.3)        |
|                    | Median [Q1-Q3] | 38 [33 - 43]    | 40 [34 - 46]    | 39 [33 - 44]    |

MESA participants with both whole genome sequencing data and cardiac MRI at “Exam 5” were included in the analysis, excluding those with heart disease or evidence of myocardial scar.

## Supplementary Table 5: Genes in cardiomyopathy panels

The 129 genes in this table were assembled from 3 commercially available cardiomyopathy gene panels noted in the main text: from GeneDx, Invitae, and the Partners Laboratory for Molecular Medicine.

|        |       |       |        |        |        |       |         |         |          |
|--------|-------|-------|--------|--------|--------|-------|---------|---------|----------|
| A2ML1  | CALR3 | DOLK  | GAA    | LAMP2  | MT-TH  | MYH7  | PDLIM3  | SCN5A   | TMEM70   |
| ABCC9  | CASQ2 | DSC2  | GATA4  | LDB3   | MT-TI  | MYL2  | PKP2    | SDHA    | TMPO     |
| ACADVL | CAV3  | DSG2  | GATA6  | LMNA   | MT-TK  | MYL3  | PLEKHM2 | SGCD    | TNNC1    |
| ACTC1  | CBL   | DSP   | GATAD1 | LRRC10 | MT-TL1 | MYLK2 | PLN     | SHOC2   | TNNI3    |
| ACTN2  | CHRM2 | DTNA  | GLA    | MAP2K1 | MT-TL2 | MYOM1 | PRDM16  | SLC22A5 | TNNT2    |
| AGL    | CPT2  | ELAC2 | HCN4   | MAP2K2 | MT-TM  | MYOZ2 | PRKAG2  | SOS1    | TOR1AIP1 |
| AKAP9  | CRYAB | EMD   | HFE    | MED12  | MT-TQ  | MYPN  | PTPN11  | SOS2    | TPM1     |
| ALMS1  | CSRP3 | EYA4  | HRAS   | MIB1   | MT-TS1 | NEBL  | RAF1    | SPRED1  | TRDN     |

|         |         |      |       |        |        |        |       |        |        |
|---------|---------|------|-------|--------|--------|--------|-------|--------|--------|
| ALPK3   | CTF1    | FHL1 | ILK   | MT-ND1 | MT-TS2 | NEXN   | RASA1 | TAZ    | TTN    |
| ANKRD1  | CTNNA3  | FHL2 | JPH2  | MT-ND5 | MTO1   | NF1    | RBM20 | TBX20  | TTR    |
| BAG3    | DES     | FKRP | JUP   | MT-ND6 | MURC   | NKX2-5 | RIT1  | TCAP   | TXNRD2 |
| BRAF    | DMD     | FKTN | KRAS  | MT-TD  | MYBPC3 | NPPA   | RRAS  | TGFB3  | VCL    |
| CACNA1C | DNAJC19 | FLNC | LAMA4 | MT-TG  | MYH6   | NRAS   | RYR2  | TMEM43 |        |

## Supplementary Table 6: Colocation with Mendelian cardiomyopathy genes

|       |       |         |        |     |
|-------|-------|---------|--------|-----|
| ACTN2 | FLNC  | NKX2-5  | RBM20  | TTN |
| ALPK3 | GATA4 | PLEKHM2 | RYR2   |     |
| BAG3  | MYH6  | PLN     | SHOC2  |     |
| CSRP3 | MYH7  | PTPN11  | TMEM43 |     |

Each listed gene is located within 500 kilobases of a lead SNP from one of the seven traits, and was found in the list of 129 Mendelian cardiomyopathy-related genes in **Supplementary Table 5**.

## Supplementary Table 7: PheWAS results for curated disease phenotypes

| Curated Disease Phenotype   | PRS    | N      | N With Phenotype | Beta   | SE    | -log <sub>10</sub> (P) |
|-----------------------------|--------|--------|------------------|--------|-------|------------------------|
| Dilated cardiomyopathy      | lvesvi | 449027 | 923              | 0.413  | 0.034 | 33.07                  |
| Hypertension                | lvedv  | 449027 | 156957           | -0.039 | 0.003 | 31.01                  |
| Dilated cardiomyopathy      | lvesv  | 449027 | 923              | 0.386  | 0.034 | 29.93                  |
| Dilated cardiomyopathy      | lvef   | 449027 | 923              | -0.384 | 0.034 | 28.01                  |
| Hypertension                | sv     | 449027 | 156957           | -0.036 | 0.003 | 27.20                  |
| Heart_Failure               | lvesvi | 449027 | 9226             | 0.109  | 0.011 | 23.52                  |
| Hypothyroidism              | lvedvi | 449027 | 28703            | -0.059 | 0.006 | 20.63                  |
| Hypothyroidism              | sv     | 449027 | 28703            | -0.059 | 0.006 | 20.39                  |
| Hypertrophic cardiomyopathy | lvesvi | 449027 | 357              | -0.450 | 0.051 | 18.15                  |
| Hypothyroidism              | lvesv  | 449027 | 28703            | -0.054 | 0.006 | 17.52                  |
| Hypertrophic cardiomyopathy | lvef   | 449027 | 357              | 0.451  | 0.052 | 17.52                  |
| Psoriasis                   | lvedv  | 449027 | 7008             | -0.100 | 0.012 | 16.31                  |
| Heart_Failure               | lvef   | 449027 | 9226             | -0.090 | 0.011 | 15.96                  |
| Psoriasis                   | sv     | 449027 | 7008             | -0.097 | 0.012 | 15.30                  |
| Coronary_Artery_Disease     | sv     | 449027 | 25195            | -0.052 | 0.007 | 14.24                  |
| Hypertrophic cardiomyopathy | lvesv  | 449027 | 357              | -0.395 | 0.053 | 13.26                  |
| Heart_Failure               | lvesv  | 449027 | 9226             | 0.077  | 0.011 | 12.33                  |
| Hypercholesterolemia        | sv     | 449027 | 85925            | -0.029 | 0.004 | 12.15                  |
| Venous_thromboembolism      | svi    | 449027 | 16854            | 0.057  | 0.008 | 11.68                  |
| Myocardial_Infarction       | sv     | 449027 | 19286            | -0.049 | 0.008 | 10.24                  |

|                                        |        |        |        |        |       |      |
|----------------------------------------|--------|--------|--------|--------|-------|------|
| Hypertension                           | lvedvi | 449027 | 156957 | -0.021 | 0.003 | 9.95 |
| Hypercholesterolemia                   | lvedv  | 449027 | 85925  | -0.025 | 0.004 | 9.83 |
| Dilated cardiomyopathy                 | lvedvi | 449027 | 923    | 0.203  | 0.033 | 8.94 |
| Coronary_Artery_Disease                | lvedv  | 449027 | 25195  | -0.041 | 0.007 | 8.93 |
| Dilated cardiomyopathy                 | lvedv  | 449027 | 923    | 0.198  | 0.033 | 8.64 |
| Rheumatoid_arthritis                   | sv     | 449027 | 8751   | -0.064 | 0.011 | 8.35 |
| Pulmonary_embolism                     | svi    | 449027 | 5032   | 0.085  | 0.015 | 8.04 |
| Mitral_valve_disease                   | lvef   | 449027 | 5978   | -0.075 | 0.013 | 7.79 |
| Myocardial_Infarction                  | lvedv  | 449027 | 19286  | -0.042 | 0.008 | 7.57 |
| Mitral_regurgitation                   | lvef   | 449027 | 3395   | -0.097 | 0.018 | 7.34 |
| Hypertension                           | lvesvi | 449027 | 156957 | 0.018  | 0.003 | 7.11 |
| Atrial_fibrillation_or_flutter         | lvesv  | 449027 | 21367  | -0.038 | 0.007 | 7.07 |
| Hypothyroidism                         | lvedv  | 449027 | 28703  | -0.032 | 0.006 | 6.77 |
| Cardiac_surgery                        | sv     | 449027 | 8053   | -0.056 | 0.011 | 6.13 |
| Asthma                                 | sv     | 449027 | 60959  | 0.022  | 0.004 | 6.01 |
| Mitral_valve_disease                   | lvesvi | 449027 | 5978   | 0.064  | 0.013 | 5.88 |
| Atrial_fibrillation_or_flutter         | lvesvi | 449027 | 21367  | -0.034 | 0.007 | 5.83 |
| Mitral_regurgitation                   | lvesvi | 449027 | 3395   | 0.082  | 0.017 | 5.65 |
| Coronary_Artery_Disease                | lvef   | 449027 | 25195  | -0.031 | 0.007 | 5.46 |
| Diabetes_Type_1                        | lvesv  | 449027 | 3914   | -0.075 | 0.016 | 5.44 |
| Hypertension                           | svi    | 449027 | 156957 | -0.015 | 0.003 | 5.14 |
| Breast_cancer                          | lvedvi | 449027 | 16179  | 0.036  | 0.008 | 4.93 |
| Myocardial_Infarction                  | lvef   | 449027 | 19286  | -0.033 | 0.008 | 4.93 |
| Diabetes_Type_2                        | lvedv  | 449027 | 28041  | -0.027 | 0.006 | 4.82 |
| Implantable_cardioverter_defibrillator | lvesvi | 449027 | 1051   | 0.132  | 0.031 | 4.61 |
| Coronary_Artery_Disease                | lvedvi | 449027 | 25195  | -0.027 | 0.007 | 4.27 |
| Peripheral_vascular_disease            | lvesv  | 449027 | 6426   | -0.051 | 0.013 | 4.25 |
| Diabetes_Type_1                        | sv     | 449027 | 3914   | -0.065 | 0.016 | 4.23 |
| Hernia                                 | lvedv  | 449027 | 59636  | -0.018 | 0.004 | 4.20 |

Effect size, standard error, and P value are displayed for the association between manually curated phenotypes and the seven cardiac trait polygenic scores. Using Bonferroni correction to account for multiple testing (7 scores, 96 phenotypes), an association  $P < 7.4 \times 10^{-5}$  with any of the 7 polygenic scores is considered significant and is listed in this table.

### Supplementary Table 8: Characteristics of unrelated participants who did not undergo cardiac MRI

|                          |           |                         |
|--------------------------|-----------|-------------------------|
|                          |           | <b>All Participants</b> |
| <b>N</b>                 |           | 362922                  |
| <b>Sex</b>               |           |                         |
|                          | Women     | 200744 (55 %)           |
|                          | Men       | 162178 (45 %)           |
| <b>Age at enrollment</b> |           |                         |
|                          | Mean (SD) | 57 (8.1)                |

|                                                   |                      |                   |
|---------------------------------------------------|----------------------|-------------------|
|                                                   | Median [Q1-Q3]       | 58 [50 - 64]      |
| <b>Ancestry</b>                                   |                      |                   |
|                                                   | African              | 2937 (1 %)        |
|                                                   | East Asian           | 1303 (0 %)        |
|                                                   | European             | 348778 (96 %)     |
|                                                   | Other Ancestry       | 3670 (1 %)        |
|                                                   | South Asian          | 6234 (2 %)        |
| <b>BMI (kg/m<sup>2</sup>)</b>                     |                      |                   |
|                                                   | Mean (SD)            | 27 (4.8)          |
|                                                   | Median [Q1-Q3]       | 27 [24 - 30]      |
|                                                   | Missing              | 1572 (0.4%)       |
| <b>Height (cm)</b>                                |                      |                   |
|                                                   | Mean (SD)            | 170 (9.3)         |
|                                                   | Median [Q1-Q3]       | 170 [160 - 180]   |
|                                                   | Missing              | 1159 (0.3%)       |
| <b>Weight (kg)</b>                                |                      |                   |
|                                                   | Mean (SD)            | 78 (16)           |
|                                                   | Median [Q1-Q3]       | 76 [66 - 87]      |
|                                                   | Missing              | 1321 (0.4%)       |
| <b>SBP (mmHg)</b>                                 |                      |                   |
|                                                   | Mean (SD)            | 140 (19)          |
|                                                   | Median [Q1-Q3]       | 140 [120 - 150]   |
|                                                   | Missing              | 446 (0.1%)        |
| <b>DBP (mmHg)</b>                                 |                      |                   |
|                                                   | Mean (SD)            | 82 (10)           |
|                                                   | Median [Q1-Q3]       | 82 [76 - 89]      |
|                                                   | Missing              | 444 (0.1%)        |
| <b>MET minutes/week</b>                           |                      |                   |
|                                                   | Mean (SD)            | 2700 (3800)       |
|                                                   | Median [Q1-Q3]       | 1500 [570 - 3200] |
| <b>Standard drinks/week</b>                       |                      |                   |
|                                                   | Mean (SD)            | 12 (11)           |
|                                                   | Median [Q1-Q3]       | 9.0 [5.3 - 16]    |
|                                                   | Missing              | 118596 (32.7%)    |
| <b>Pack year smoking history</b>                  |                      |                   |
|                                                   | Mean (SD)            | 6.8 (15)          |
|                                                   | Median [Q1-Q3]       | 0.0 [0.0 - 6.9]   |
| <b>Smoking status at enrollment</b>               |                      |                   |
|                                                   | Current              | 39148 (11 %)      |
|                                                   | Never                | 198743 (55 %)     |
|                                                   | Prefer not to answer | 1503 (0 %)        |
|                                                   | Previous             | 123086 (34 %)     |
|                                                   | unknown              | 442 (0 %)         |
| <b>Diabetes diagnosis at baseline</b>             |                      |                   |
|                                                   | Absent               | 355468 (98 %)     |
|                                                   | Present              | 7454 (2 %)        |
| <b>Hypercholesterolemia diagnosis at baseline</b> |                      |                   |
|                                                   | Absent               | 316299 (87 %)     |

|                                           |         |               |
|-------------------------------------------|---------|---------------|
|                                           | Present | 46623 (13 %)  |
| <b>Hypertension diagnosis at baseline</b> | Absent  | 261601 (72 %) |
|                                           | Present | 101321 (28 %) |

This table presents the characteristics of the unrelated participants with genetic data who did not undergo cardiac MRI, and who were assessed for the ability of the polygenic scores to predict incident DCM.

## Supplementary Table 9: Polygenic scores from cardiac MRI phenotypes are associated with incident DCM

| Source of SNP Score | Hazard Ratio | 95% CI Lower | 95% CI Upper | P-value         | SNPs      |
|---------------------|--------------|--------------|--------------|-----------------|-----------|
| LVEDV               | 1.25         | 1.13         | 1.39         | 1.38E-05        | 22        |
| LVEDVi              | 1.24         | 1.12         | 1.37         | 4.94E-05        | 14        |
| LVEF                | 0.66         | 0.59         | 0.73         | 5.33E-15        | 22        |
| LVESV               | 1.52         | 1.37         | 1.68         | 1.74E-15        | 32        |
| <b>LVESVi</b>       | <b>1.58</b>  | <b>1.43</b>  | <b>1.76</b>  | <b>6.47E-18</b> | <b>28</b> |
| SV                  | 1.12         | 1.01         | 1.24         | 3.08E-02        | 12        |
| SVi                 | 1.03         | 0.93         | 1.15         | 5.35E-01        | 8         |

“Hazard Ratio” represents the hazard ratio of a one standard deviation increase in the SNP

score on the probability of developing dilated cardiomyopathy.

## Supplementary Table 10: Characteristics of TTNtv carriers

|                               | Overall                        |
|-------------------------------|--------------------------------|
| <b>N</b>                      | 59                             |
| <b>Sex</b>                    |                                |
|                               | Women 34 (58 %)                |
|                               | Men 25 (42 %)                  |
| <b>Ancestry</b>               |                                |
|                               | Non-European 10 (17 %)         |
|                               | European 49 (83 %)             |
| <b>Age</b>                    |                                |
|                               | Mean (SD) 55 (7.9)             |
|                               | Median [Q1-Q3] 56 [47 - 61]    |
| <b>BMI (kg/m<sup>2</sup>)</b> |                                |
|                               | Mean (SD) 27 (4.0)             |
|                               | Median [Q1-Q3] 26 [24 - 30]    |
| <b>Height (cm)</b>            |                                |
|                               | Mean (SD) 170 (9.8)            |
|                               | Median [Q1-Q3] 170 [160 - 180] |
| <b>Weight (kg)</b>            |                                |
|                               | Mean (SD) 77 (13)              |
|                               | Median [Q1-Q3] 75 [68 - 85]    |
| <b>LVEDV (mL)</b>             |                                |
|                               | Mean (SD) 140 (30)             |
|                               | Median [Q1-Q3] 140 [120 - 160] |

|                   |                |                    |
|-------------------|----------------|--------------------|
| <b>LVESV (mL)</b> | Mean (SD)      | 58 (22)            |
|                   | Median [Q1-Q3] | 54 [43 - 69]       |
| <b>LVEF (%)</b>   | Mean (SD)      | 0.59 (0.080)       |
|                   | Median [Q1-Q3] | 0.61 [0.54 - 0.65] |

### Supplementary Table 11: Imputed TTNtv were not confirmed by exome sequencing

| SNP         | N Imputed | N Confirmed By Sequence | Cohort-wide MAF | INFO |
|-------------|-----------|-------------------------|-----------------|------|
| rs565761937 | 40        | 0                       | 8.21E-04        | 0.66 |
| rs557312035 | 6         | 0                       | 9.31E-05        | 0.45 |
| rs565675340 | 6         | 0                       | 8.26E-04        | 0.25 |
| rs574660186 | 3         | 0                       | 5.65E-05        | 0.95 |
| rs548010682 | 2         | 0                       | 4.35E-05        | 0.77 |
| rs185589320 | 2         | 0                       | 5.86E-05        | 0.86 |
| rs112188483 | 2         | 0                       | 3.45E-05        | 0.35 |
| rs542074139 | 2         | 0                       | 2.25E-05        | 0.77 |
| rs140743001 | 1         | 0                       | 1.62E-04        | 0.27 |
| rs561946873 | 1         | 0                       | 4.03E-05        | 0.40 |
| rs145423907 | 1         | 0                       | 6.13E-04        | 0.20 |

Genome-wide genotyping data was imputed and provided by the UK Biobank. Within the subset of 49,997 participants with exome sequencing data, 66 had imputed SNPs predicted to create a TTNtv. However, 0 of these 66 were confirmed in exome sequencing. Each imputed SNP, the number of participants imputed as having the SNP, the MAF of the SNP in the entire UK Biobank, and the imputation INFO score are displayed.

### Supplementary Table 12: Clinical characteristics of European UK Biobank participants with cardiac MRI data

|                               |                | Women         | Men           | All           |
|-------------------------------|----------------|---------------|---------------|---------------|
| <b>N</b>                      |                | 17318         | 15437         | 32755         |
| <b>Age at MRI</b>             | Mean (SD)      | 64 (7.4)      | 65 (7.6)      | 64 (7.5)      |
|                               | Median [Q1-Q3] | 64 [58 - 69]  | 66 [59 - 71]  | 65 [58 - 70]  |
| <b>Ancestry</b>               | European       | 17318 (100 %) | 15437 (100 %) | 32755 (100 %) |
|                               |                |               |               |               |
| <b>BMI (kg/m<sup>2</sup>)</b> | Mean (SD)      | 26 (4.7)      | 27 (3.9)      | 26 (4.4)      |
|                               | Median [Q1-Q3] | 25 [23 - 28]  | 26 [24 - 29]  | 26 [23 - 29]  |
|                               | Missing        | 497 (2.9%)    | 386 (2.5%)    | 883 (2.7%)    |
| <b>Height (cm)</b>            |                |               |               |               |

|                                     |                      |                   |                   |                   |
|-------------------------------------|----------------------|-------------------|-------------------|-------------------|
|                                     | Mean (SD)            | 160 (6.2)         | 180 (6.6)         | 170 (9.3)         |
|                                     | Median [Q1-Q3]       | 160 [160 - 170]   | 180 [170 - 180]   | 170 [160 - 180]   |
|                                     | Missing              | 450 (2.6%)        | 350 (2.3%)        | 800 (2.4%)        |
| <b>Weight (kg)</b>                  |                      |                   |                   |                   |
|                                     | Mean (SD)            | 69 (13)           | 84 (13)           | 76 (15)           |
|                                     | Median [Q1-Q3]       | 67 [60 - 76]      | 82 [75 - 91]      | 75 [65 - 85]      |
|                                     | Missing              | 454 (2.6%)        | 372 (2.4%)        | 826 (2.5%)        |
| <b>SBP (mmHg)</b>                   |                      |                   |                   |                   |
|                                     | Mean (SD)            | 130 (18)          | 140 (16)          | 140 (18)          |
|                                     | Median [Q1-Q3]       | 130 [120 - 140]   | 140 [130 - 150]   | 130 [120 - 150]   |
|                                     | Missing              | 7 (0.0%)          | 0 (0%)            | 7 (0.0%)          |
| <b>DBP (mmHg)</b>                   |                      |                   |                   |                   |
|                                     | Mean (SD)            | 79 (9.7)          | 84 (9.6)          | 81 (9.9)          |
|                                     | Median [Q1-Q3]       | 79 [73 - 86]      | 84 [77 - 90]      | 81 [75 - 88]      |
|                                     | Missing              | 7 (0.0%)          | 0 (0%)            | 7 (0.0%)          |
| <b>MET minutes/week</b>             |                      |                   |                   |                   |
|                                     | Mean (SD)            | 2400 (3000)       | 2600 (3400)       | 2500 (3200)       |
|                                     | Median [Q1-Q3]       | 1500 [620 - 2900] | 1600 [690 - 3200] | 1500 [660 - 3100] |
| <b>Standard drinks/week</b>         |                      |                   |                   |                   |
|                                     | Mean (SD)            | 9.2 (6.9)         | 15 (11)           | 12 (9.4)          |
|                                     | Median [Q1-Q3]       | 7.3 [4.5 - 12]    | 12 [7.3 - 19]     | 9.3 [6.0 - 16]    |
|                                     | Missing              | 4978 (28.7%)      | 2563 (16.6%)      | 7541 (23.0%)      |
| <b>Pack year smoking history</b>    |                      |                   |                   |                   |
|                                     | Mean (SD)            | 3.6 (9.0)         | 5.7 (13)          | 4.6 (11)          |
|                                     | Median [Q1-Q3]       | 0.0 [0.0 - 0.0]   | 0.0 [0.0 - 3.8]   | 0.0 [0.0 - 0.0]   |
| <b>Smoking status at enrollment</b> |                      |                   |                   |                   |
|                                     | Current              | 861 (5 %)         | 1090 (7 %)        | 1951 (6 %)        |
|                                     | Never                | 11136 (64 %)      | 8847 (57 %)       | 19983 (61 %)      |
|                                     | Prefer_not_to_answer | 34 (0 %)          | 30 (0 %)          | 64 (0 %)          |
|                                     | Previous             | 5287 (31 %)       | 5470 (35 %)       | 10757 (33 %)      |
| <b>LVEDV</b>                        |                      |                   |                   |                   |
|                                     | Mean (SD)            | 120 (20)          | 150 (28)          | 140 (29)          |
|                                     | Median [Q1-Q3]       | 120 [110 - 140]   | 150 [130 - 170]   | 130 [120 - 150]   |
| <b>LVEDVi</b>                       |                      |                   |                   |                   |
|                                     | Mean (SD)            | 70 (11)           | 76 (14)           | 73 (12)           |
|                                     | Median [Q1-Q3]       | 70 [63 - 77]      | 76 [67 - 85]      | 72 [65 - 80]      |
|                                     | Missing              | 480 (2.8%)        | 381 (2.5%)        | 861 (2.6%)        |
| <b>LVESV</b>                        |                      |                   |                   |                   |
|                                     | Mean (SD)            | 42 (11)           | 58 (17)           | 49 (16)           |
|                                     | Median [Q1-Q3]       | 41 [34 - 48]      | 56 [47 - 67]      | 47 [38 - 58]      |
| <b>LVESVi</b>                       |                      |                   |                   |                   |
|                                     | Mean (SD)            | 24 (6.1)          | 29 (8.0)          | 26 (7.5)          |
|                                     | Median [Q1-Q3]       | 23 [20 - 27]      | 28 [24 - 33]      | 25 [21 - 30]      |
|                                     | Missing              | 480 (2.8%)        | 381 (2.5%)        | 861 (2.6%)        |
| <b>LVEF</b>                         |                      |                   |                   |                   |

|            |                |                    |                    |                    |
|------------|----------------|--------------------|--------------------|--------------------|
|            | Mean (SD)      | 0.67 (0.052)       | 0.63 (0.058)       | 0.65 (0.058)       |
|            | Median [Q1-Q3] | 0.67 [0.64 - 0.70] | 0.63 [0.59 - 0.66] | 0.65 [0.61 - 0.69] |
| <b>SV</b>  |                |                    |                    |                    |
|            | Mean (SD)      | 81 (12)            | 96 (17)            | 88 (16)            |
|            | Median [Q1-Q3] | 81 [73 - 89]       | 95 [85 - 110]      | 87 [77 - 98]       |
| <b>SVi</b> |                |                    |                    |                    |
|            | Mean (SD)      | 46 (6.6)           | 47 (8.1)           | 47 (7.4)           |
|            | Median [Q1-Q3] | 46 [42 - 51]       | 47 [42 - 53]       | 47 [42 - 52]       |
|            | Missing        | 480 (2.8%)         | 381 (2.5%)         | 861 (2.6%)         |

### Supplementary Table 13: Heritability in the full sample and in the European-specific subset

|              | Heritability     |                       |
|--------------|------------------|-----------------------|
|              | All participants | European participants |
| <b>LVEDV</b> | 0.426            | 0.445                 |
| <b>LVESV</b> | 0.400            | 0.417                 |
| <b>SV</b>    | 0.342            | 0.364                 |
| <b>LVEF</b>  | 0.313            | 0.332                 |

SNP heritability was assessed with BOLT-REML. A sensitivity analysis that excluded all outliers from the genetically European subset revealed similar heritability estimates to those from the main analyses.

### Supplementary Table 14: LD score regression in the European-specific analysis

|               | Lambda | Intercept |
|---------------|--------|-----------|
| <b>LVEDV</b>  | 1.1459 | 1.0258    |
| <b>LVEDVi</b> | 1.1459 | 1.0047    |
| <b>LVESV</b>  | 1.1459 | 1.0088    |
| <b>LVESVi</b> | 1.1459 | 0.9973    |
| <b>LVEF</b>   | 1.0957 | 0.9901    |
| <b>SV</b>     | 1.1459 | 1.0277    |
| <b>SVi</b>    | 1.0957 | 1.0092    |

Lambda represents the genomic inflation factor. Intercept represents the intercept from LD score regression.



## Supplementary Table 15: Loci significant at various P value thresholds in the European-specific analysis

| P threshold | LVEDV | LVEDVi | LVESV | LVESVi | LVEF | SV | SVi | Total distinct loci |
|-------------|-------|--------|-------|--------|------|----|-----|---------------------|
| 5.00E-08    | 19    | 10     | 19    | 28     | 21   | 11 | 7   | 49                  |
| 1.00E-08    | 15    | 5      | 16    | 16     | 15   | 6  | 4   | 28                  |
| 5.00E-09    | 13    | 5      | 14    | 15     | 15   | 5  | 3   | 26                  |
| 1.00E-09    | 10    | 5      | 11    | 14     | 12   | 4  | 2   | 19                  |

Under each trait, the number of loci significant at the P value threshold from the leftmost column is displayed. The *Total distinct loci* column indicates the total number of distinct loci across all phenotypes, counting loci found for more than one trait just once.

## Supplementary Table 16: Loci newly achieving genome-wide significance in the European-specific analysis

| Trait | SNP         | CHR | BP        | A1 | A0 | A1 Freq | A1 Freq Euro | INFO | BETA    | BETA Euro | P        | P Euro   | Nearest Gene | Novel in Study |
|-------|-------------|-----|-----------|----|----|---------|--------------|------|---------|-----------|----------|----------|--------------|----------------|
| lvedv | rs71517989  | 8   | 56877592  | A  | AT | 0.554   | 0.554        | 0.99 | 0.0314  | 0.0367    | 1.60E-07 | 7.70E-09 | LYN          | Yes            |
| lvef  | rs36234     | 16  | 2201270   | G  | C  | 0.637   | 0.635        | 0.91 | 0.0399  | 0.0426    | 6.90E-08 | 3.00E-08 | RAB26        | No             |
| lvesv | rs113781447 | 19  | 2317945   | T  | A  | 0.982   | 0.982        | 0.92 | -0.1315 | -0.1419   | 1.20E-07 | 3.20E-08 | LSM7         | Yes            |
| lvesv | rs377751939 | 5   | 138734734 | T  | C  | 0.807   | 0.814        | 0.84 | 0.0456  | 0.0495    | 6.00E-08 | 2.50E-08 | SPATA24      | No             |
| sv    | rs149613324 | 11  | 104215908 | G  | C  | 0.991   | 0.991        | 0.84 | -0.1827 | -0.2070   | 2.80E-07 | 2.40E-08 | PDGFD        | Yes            |
| svi   | rs10258757  | 7   | 98970675  | C  | T  | 0.863   | 0.872        | 1.00 | -0.0586 | -0.0663   | 7.70E-08 | 7.70E-09 | ARPC1A       | Yes            |

BP is the base pair distance, keyed to GRCh37. A1 is the effect allele, A0 is the non-effect

allele. A1 Freq Euro represents the effect allele frequency in the European-specific analysis.

BETA Euro and P Euro, respectively, represent the effect size and P value in the

European-specific analysis. Novel in Study indicates whether a locus was detected for another trait in the main analysis (*No*) or whether the locus was not detected in the main analysis (*Yes*).

Supplementary Table 17: Concordance of effect estimates from lead SNPs in the main analysis and the European-specific analysis

| Trait  | P Threshold | Evaluated SNPs | R <sup>2</sup> |
|--------|-------------|----------------|----------------|
| lvedv  | 1           | 14457773       | 0.52           |
|        | 0.05        | 910097         | 0.91           |
|        | 0.005       | 130905         | 0.96           |
|        | 0.0005      | 26359          | 0.99           |
|        | 5.00E-05    | 8183           | 0.99           |
|        | 5.00E-06    | 3414           | 1.00           |
|        | 5.00E-07    | 1869           | 1.00           |
|        | 5.00E-08    | 1150           | 1.00           |
|        | 5.00E-09    | 552            | 1.00           |
| lvedvi | 1           | 14459489       | 0.52           |
|        | 0.05        | 867566         | 0.91           |
|        | 0.005       | 115475         | 0.97           |
|        | 0.0005      | 19745          | 0.99           |
|        | 5.00E-05    | 5466           | 1.00           |
|        | 5.00E-06    | 1690           | 1.00           |
|        | 5.00E-07    | 832            | 1.00           |
|        | 5.00E-08    | 513            | 1.00           |
|        | 5.00E-09    | 256            | 1.00           |
| lvesv  | 1           | 14458151       | 0.52           |
|        | 0.05        | 907979         | 0.89           |
|        | 0.005       | 134774         | 0.96           |
|        | 0.0005      | 28470          | 0.99           |
|        | 5.00E-05    | 9758           | 1.00           |
|        | 5.00E-06    | 4459           | 1.00           |
|        | 5.00E-07    | 2743           | 1.00           |
|        | 5.00E-08    | 1788           | 1.00           |
|        | 5.00E-09    | 1159           | 1.00           |
| lvesvi | 1           | 14459698       | 0.52           |
|        | 0.05        | 883056         | 0.89           |
|        | 0.005       | 122307         | 0.95           |
|        | 0.0005      | 23158          | 0.99           |

|      |          |          |      |
|------|----------|----------|------|
|      | 5.00E-05 | 7774     | 0.99 |
|      | 5.00E-06 | 3434     | 1.00 |
|      | 5.00E-07 | 2322     | 1.00 |
|      | 5.00E-08 | 1728     | 1.00 |
|      | 5.00E-09 | 1292     | 1.00 |
| lvef | 1        | 14457483 | 0.51 |
|      | 0.05     | 859758   | 0.88 |
|      | 0.005    | 119329   | 0.95 |
|      | 0.0005   | 24647    | 0.98 |
|      | 5.00E-05 | 7924     | 1.00 |
|      | 5.00E-06 | 4284     | 1.00 |
|      | 5.00E-07 | 2266     | 1.00 |
|      | 5.00E-08 | 1630     | 1.00 |
|      | 5.00E-09 | 1166     | 1.00 |
| sv   | 1        | 14457631 | 0.52 |
|      | 0.05     | 859053   | 0.92 |
|      | 0.005    | 115812   | 0.97 |
|      | 0.0005   | 21115    | 0.99 |
|      | 5.00E-05 | 4696     | 0.99 |
|      | 5.00E-06 | 1754     | 1.00 |
|      | 5.00E-07 | 755      | 1.00 |
|      | 5.00E-08 | 400      | 1.00 |
|      | 5.00E-09 | 216      | 1.00 |
| svi  | 1        | 14458828 | 0.52 |
|      | 0.05     | 828266   | 0.91 |
|      | 0.005    | 105162   | 0.96 |
|      | 0.0005   | 15729    | 0.99 |
|      | 5.00E-05 | 3262     | 0.99 |
|      | 5.00E-06 | 844      | 1.00 |
|      | 5.00E-07 | 285      | 1.00 |
|      | 5.00E-08 | 91       | 1.00 |
|      | 5.00E-09 | 8        | 1.00 |

For each trait, effect estimates (Beta) for each SNP in the main analysis were compared with those in the European-specific analysis in a linear model. Using different subsets of SNPs based on the P value in the main analysis, agreement was assessed by the overall model fit ( $r^2$ ).

### Supplementary Table 18: Directional concordance of genome-wide significant SNPs from the main analysis and the European-specific analysis

| Trait  | Evaluated SNPs | SNPs at P < 5E-08 in the main analysis | Sign mismatches in the European-specific analysis |
|--------|----------------|----------------------------------------|---------------------------------------------------|
| lvedv  | 14528119       | 1150                                   | 0                                                 |
| lvedvi | 14529827       | 513                                    | 0                                                 |
| lvesv  | 14528119       | 1788                                   | 0                                                 |
| lvesvi | 14529827       | 1728                                   | 0                                                 |
| lvef   | 14528119       | 1630                                   | 0                                                 |
| sv     | 14528119       | 400                                    | 0                                                 |
| svi    | 14529827       | 91                                     | 0                                                 |

No lead SNPs with P < 5e-8 in the main analysis had an opposite direction of effect in the European-specific analysis.

### Supplementary Table 19: Characteristics of unrelated European participants who did not undergo cardiac MRI

|                               |                | All European Participants |
|-------------------------------|----------------|---------------------------|
| <b>N</b>                      |                | 313885                    |
| <b>Sex</b>                    |                |                           |
|                               | Women          | 173092 (55 %)             |
|                               | Men            | 140793 (45 %)             |
| <b>Age at enrollment</b>      |                |                           |
|                               | Mean (SD)      | 57 (8.0)                  |
|                               | Median [Q1-Q3] | 59 [51 - 64]              |
| <b>Ancestry</b>               |                |                           |
|                               | European       | 313885 (100 %)            |
| <b>BMI (kg/m<sup>2</sup>)</b> |                |                           |
|                               | Mean (SD)      | 27 (4.8)                  |
|                               | Median [Q1-Q3] | 27 [24 - 30]              |
|                               | Missing        | 1062 (0.3%)               |
| <b>Height (cm)</b>            |                |                           |
|                               | Mean (SD)      | 170 (9.3)                 |
|                               | Median [Q1-Q3] | 170 [160 - 180]           |
|                               | Missing        | 717 (0.2%)                |
| <b>Weight (kg)</b>            |                |                           |
|                               | Mean (SD)      | 78 (16)                   |
|                               | Median [Q1-Q3] | 77 [67 - 88]              |
|                               | Missing        | 945 (0.3%)                |
| <b>SBP (mmHg)</b>             |                |                           |

|                                                   |                      |                   |
|---------------------------------------------------|----------------------|-------------------|
|                                                   | Mean (SD)            | 140 (19)          |
|                                                   | Median [Q1-Q3]       | 140 [130 - 150]   |
|                                                   | Missing              | 310 (0.1%)        |
| <b>DBP (mmHg)</b>                                 |                      |                   |
|                                                   | Mean (SD)            | 82 (10)           |
|                                                   | Median [Q1-Q3]       | 82 [76 - 89]      |
|                                                   | Missing              | 308 (0.1%)        |
| <b>MET minutes/week</b>                           |                      |                   |
|                                                   | Mean (SD)            | 2700 (3800)       |
|                                                   | Median [Q1-Q3]       | 1500 [580 - 3300] |
| <b>Standard drinks/week</b>                       |                      |                   |
|                                                   | Mean (SD)            | 12 (11)           |
|                                                   | Median [Q1-Q3]       | 9.3 [5.5 - 16]    |
|                                                   | Missing              | 93280 (29.7%)     |
| <b>Pack year smoking history</b>                  |                      |                   |
|                                                   | Mean (SD)            | 7.1 (15)          |
|                                                   | Median [Q1-Q3]       | 0.0 [0.0 - 7.5]   |
| <b>Smoking status at enrollment</b>               |                      |                   |
|                                                   | Current              | 33006 (11 %)      |
|                                                   | Never                | 170406 (54 %)     |
|                                                   | Prefer not to answer | 1108 (0 %)        |
|                                                   | Previous             | 109365 (35 %)     |
| <b>Diabetes diagnosis at baseline</b>             |                      |                   |
|                                                   | Absent               | 307966 (98 %)     |
|                                                   | Present              | 5919 (2 %)        |
| <b>Hypercholesterolemia diagnosis at baseline</b> |                      |                   |
|                                                   | Absent               | 273836 (87 %)     |
|                                                   | Present              | 40049 (13 %)      |
| <b>Hypertension diagnosis at baseline</b>         |                      |                   |
|                                                   | Absent               | 226196 (72 %)     |
|                                                   | Present              | 87689 (28 %)      |

This table presents the characteristics of the unrelated participants in the European genetic subset who did not undergo cardiac MRI, and who were assessed for the ability of the polygenic scores to predict incident DCM.

### Supplementary Table 20: Polygenic scores from cardiac MRI phenotypes are associated with incident DCM in the European-specific analysis

| Source of SNP Score | Hazard Ratio | 95% CI Lower | 95% CI Upper | P-value |
|---------------------|--------------|--------------|--------------|---------|
|---------------------|--------------|--------------|--------------|---------|

|               |             |             |             |                 |
|---------------|-------------|-------------|-------------|-----------------|
| lvedv         | 1.32        | 1.18        | 1.48        | 2.23E-06        |
| lvedvi        | 1.23        | 1.10        | 1.38        | 1.91E-04        |
| lvef          | 0.65        | 0.59        | 0.73        | 1.52E-13        |
| lvesv         | 1.48        | 1.32        | 1.65        | 7.77E-12        |
| <b>lvesvi</b> | <b>1.56</b> | <b>1.40</b> | <b>1.75</b> | <b>9.10E-15</b> |
| svi           | 1.17        | 1.05        | 1.30        | 4.82E-03        |
| svi           | 1.01        | 0.91        | 1.13        | 8.44E-01        |

“Hazard Ratio” represents the hazard ratio of a one standard deviation increase in the SNP score on the probability of developing dilated cardiomyopathy.

## Supplementary Figures

### Supplementary Figure 1: Flow diagram for UK Biobank GWAS participants

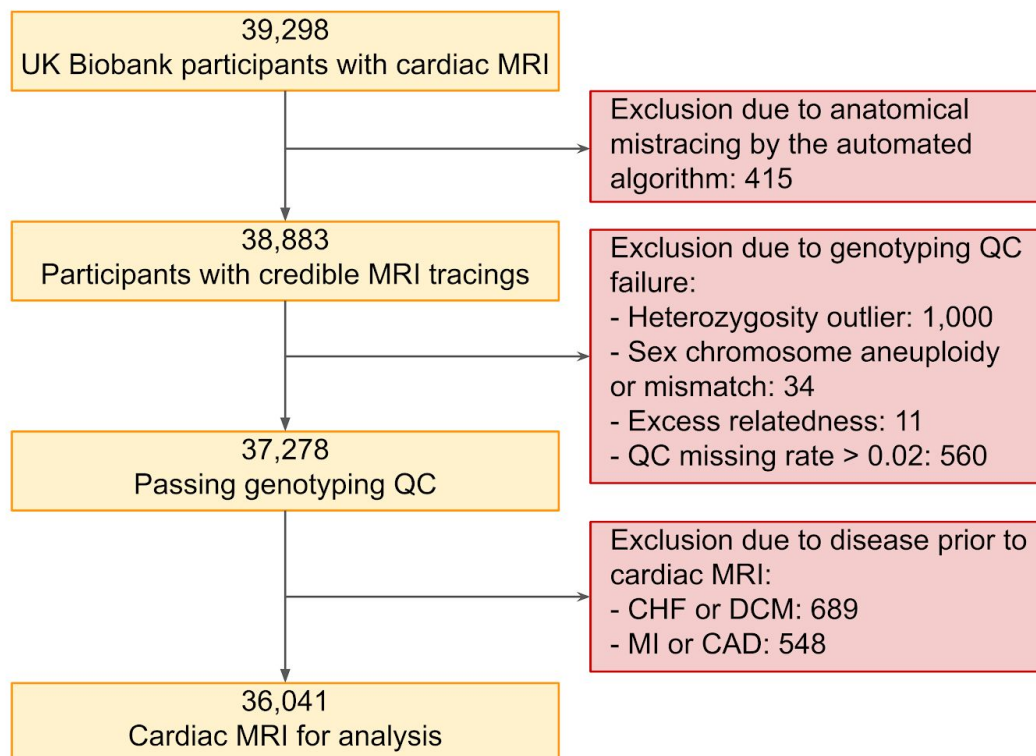

## Supplementary Figure 2: Sex-stratified distributions of cardiac MRI phenotypes

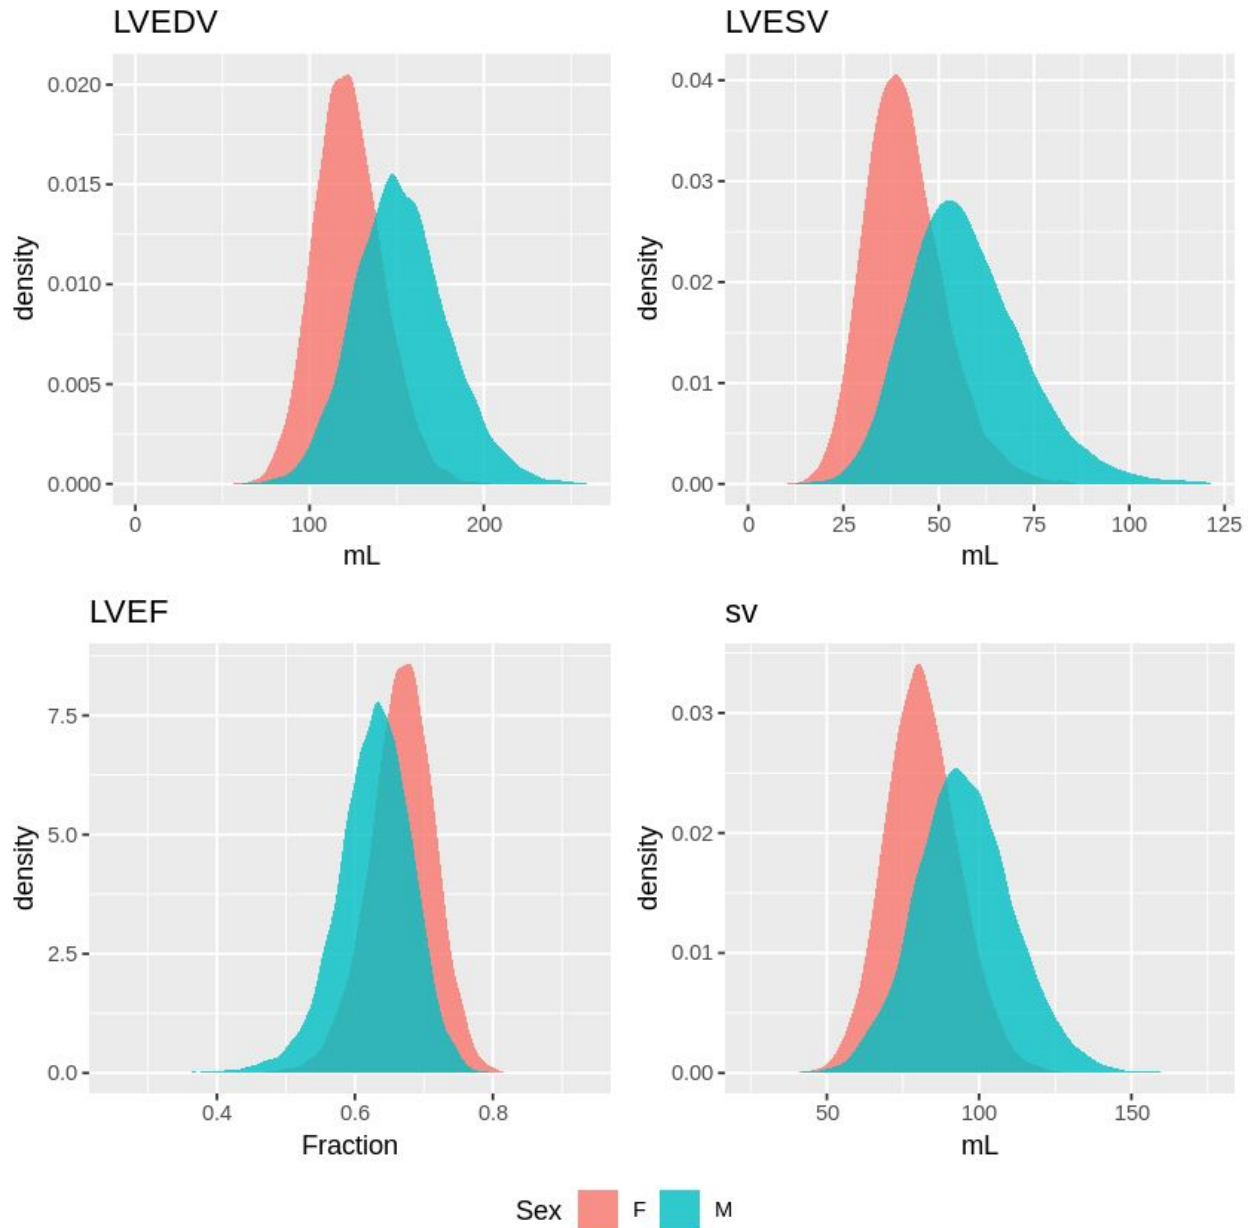

The population distributions of each of the non-BSA-indexed cardiac MRI phenotypes are represented via density plots.

Supplementary Figure 3: Cross-trait correlation

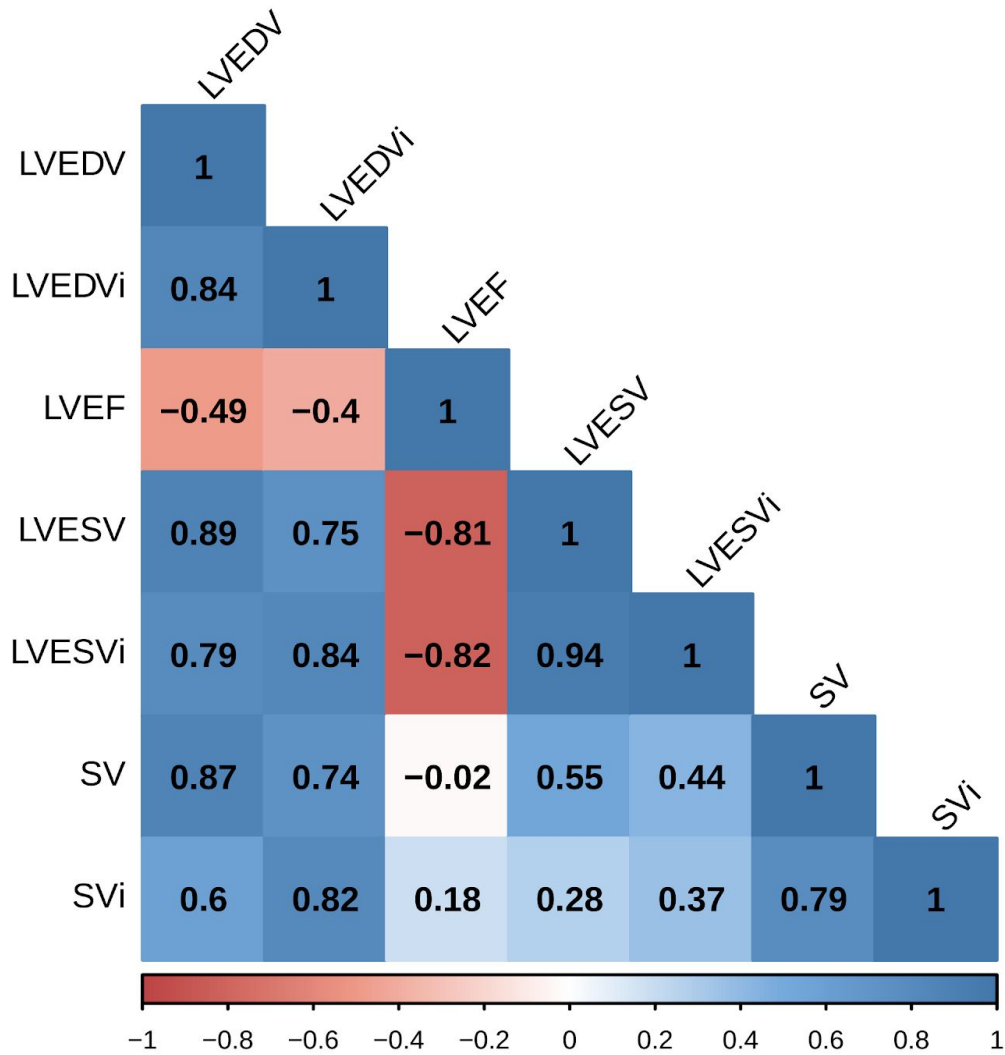

For each cardiac MRI phenotype pair, the Pearson correlation is represented by a number ranging from -1 (perfect anticorrelation) to 1 (perfect correlation), representing the degree to which each trait is correlated with another.



Supplementary Figure 4: Genetic correlation

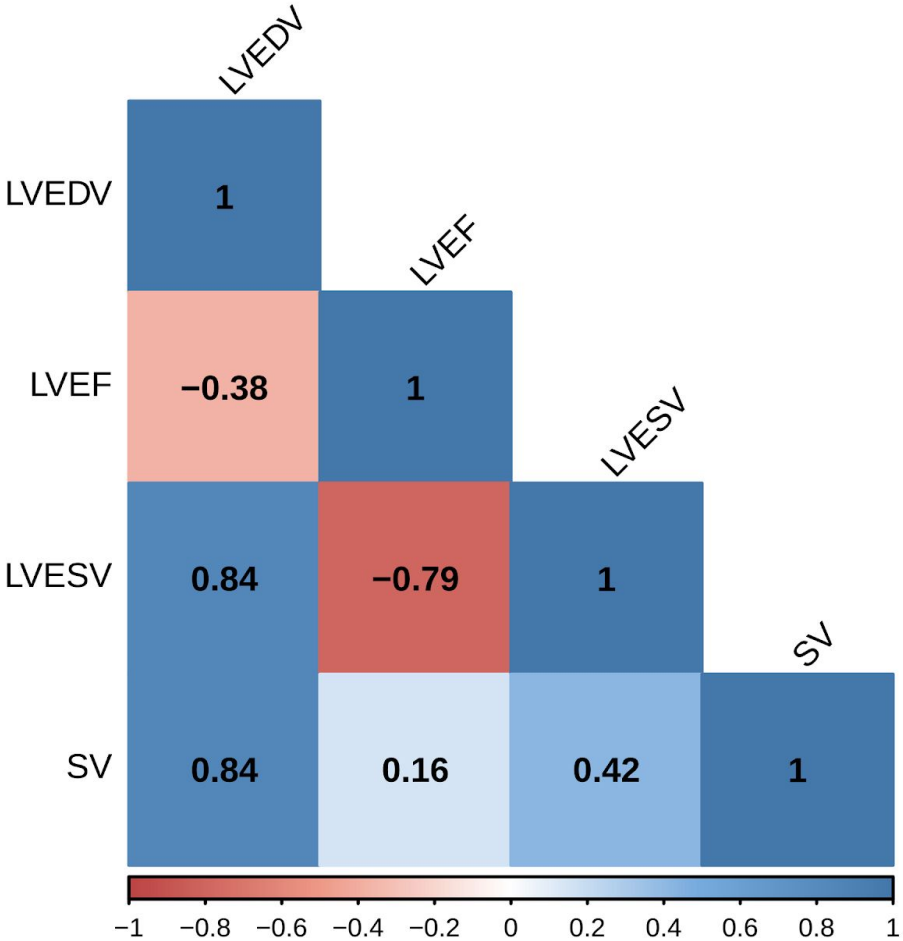

For each of the raw cardiac MRI phenotype pairs (excluding body surface area-indexed traits), the genetic correlation as measured by BOLT REML is represented by a number ranging from -1 (perfect anticorrelation) to 1 (perfect correlation).

# Supplementary Figure 5: MAGMA gene expression enrichment

For each cardiac phenotype, the associations of gene expression sets from GTEx were evaluated using MAGMA, running on the FUMA platform v1.3.4b. Gene expression sets significantly enriched after Bonferroni correction are highlighted in red.

## LVEDV

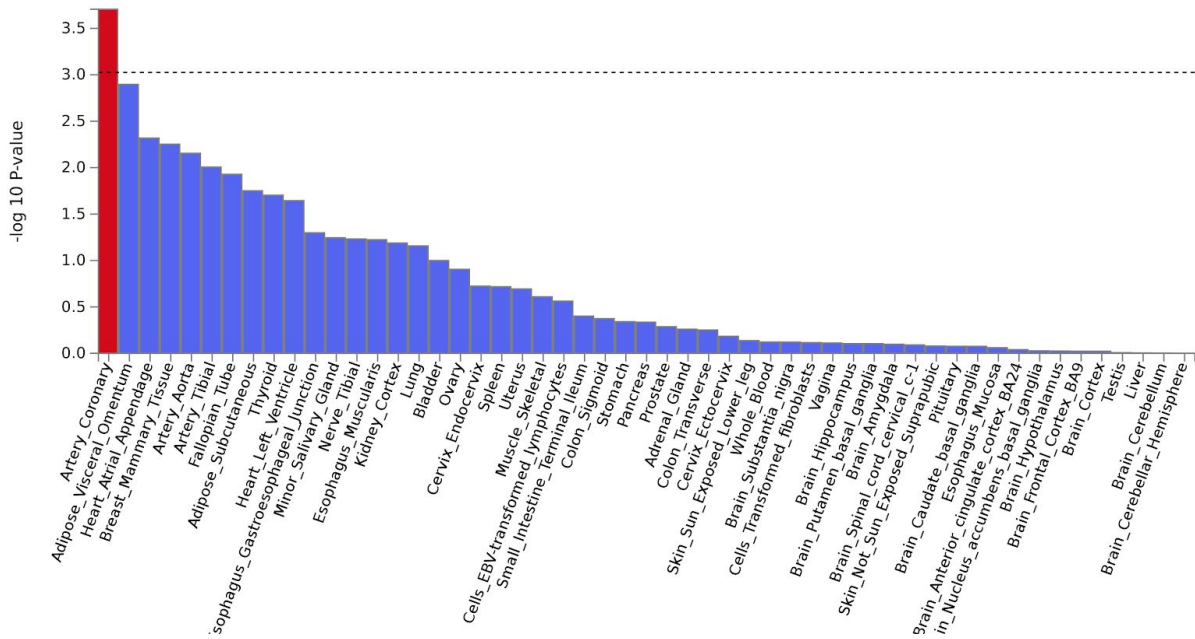

# LVESV

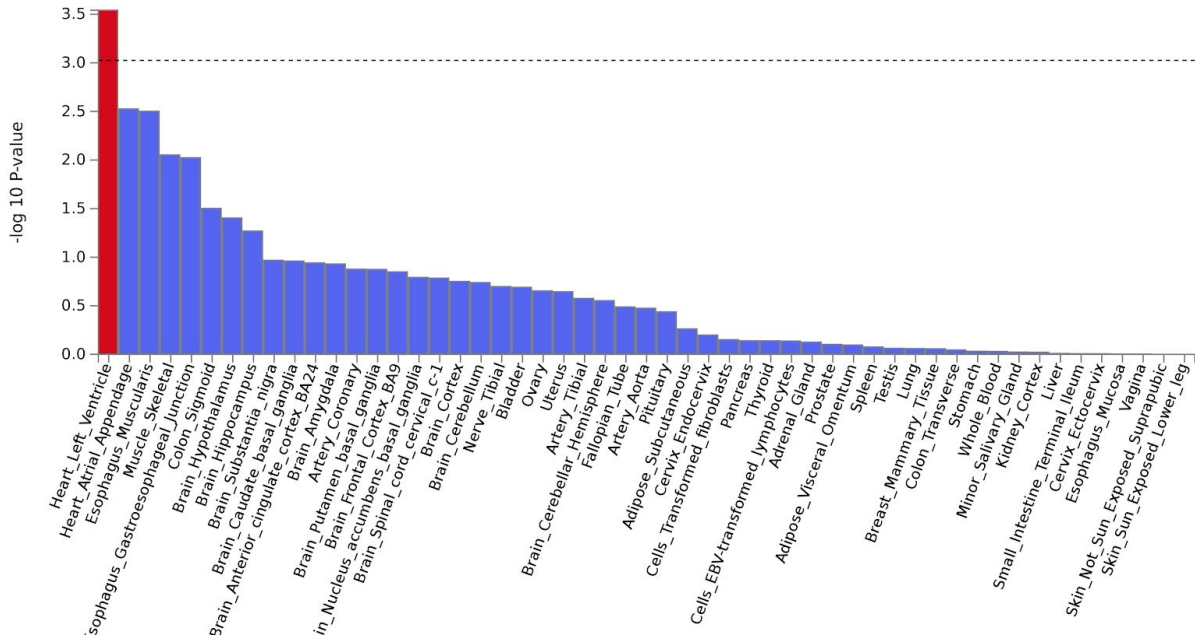

# LVEF

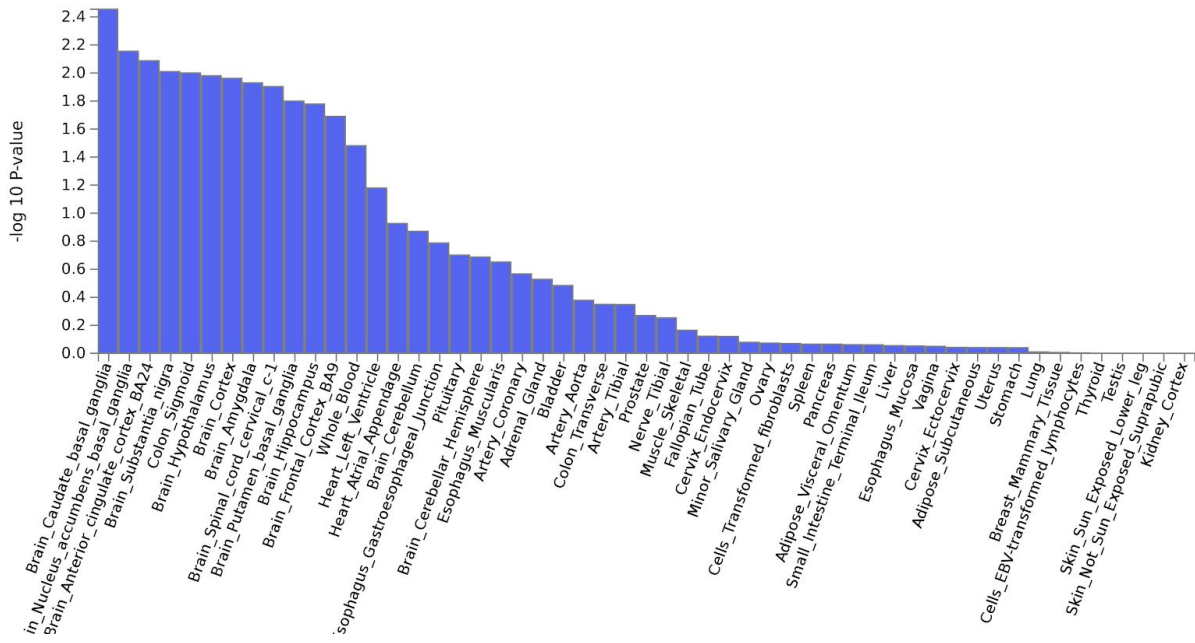

SV

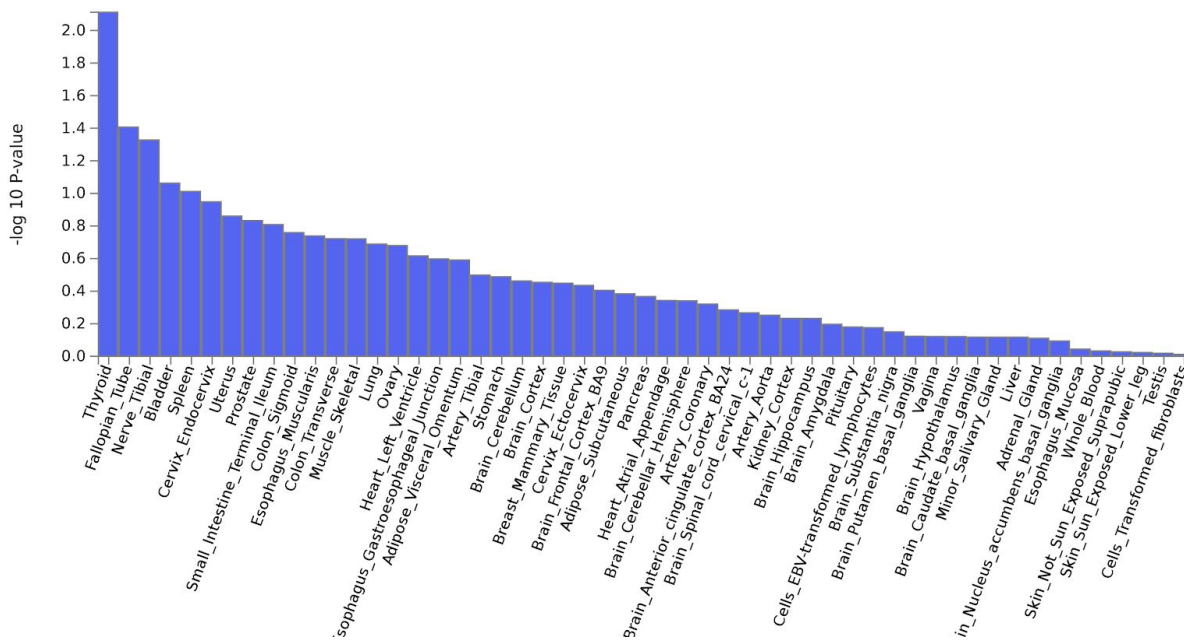

LVEDVi

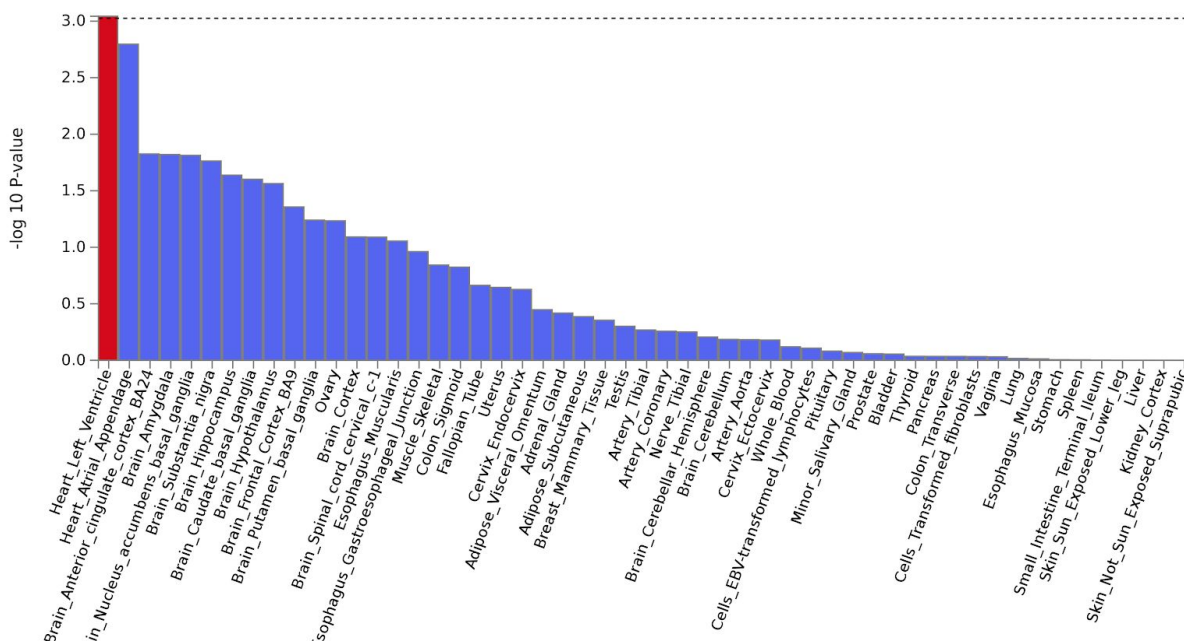

# LVESVi

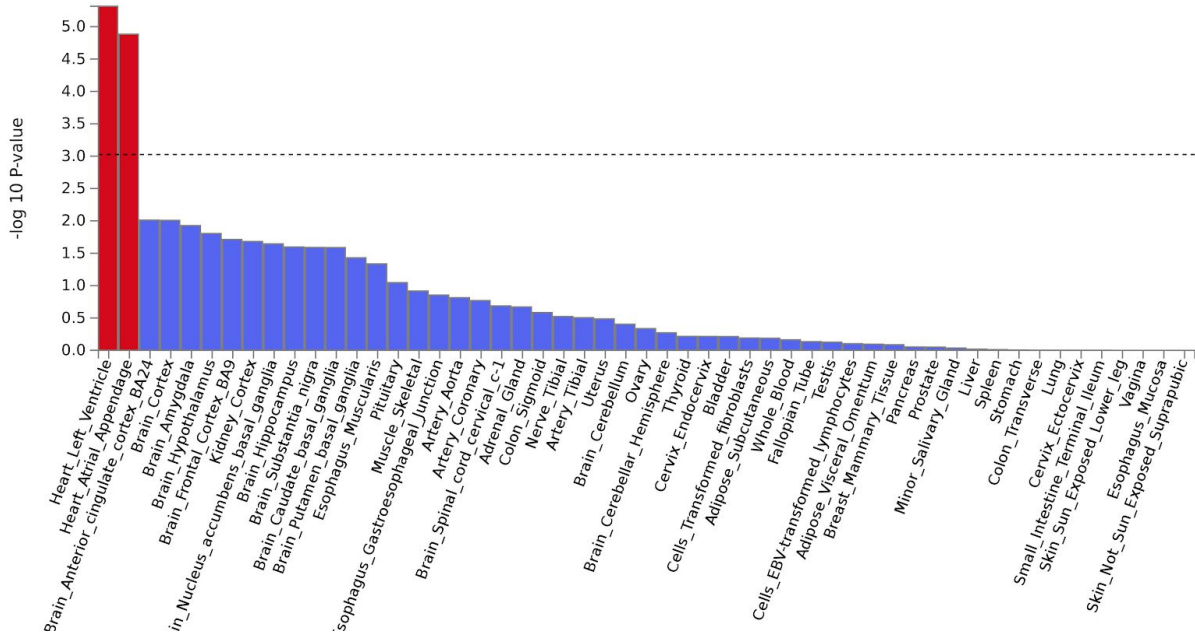

# SVi

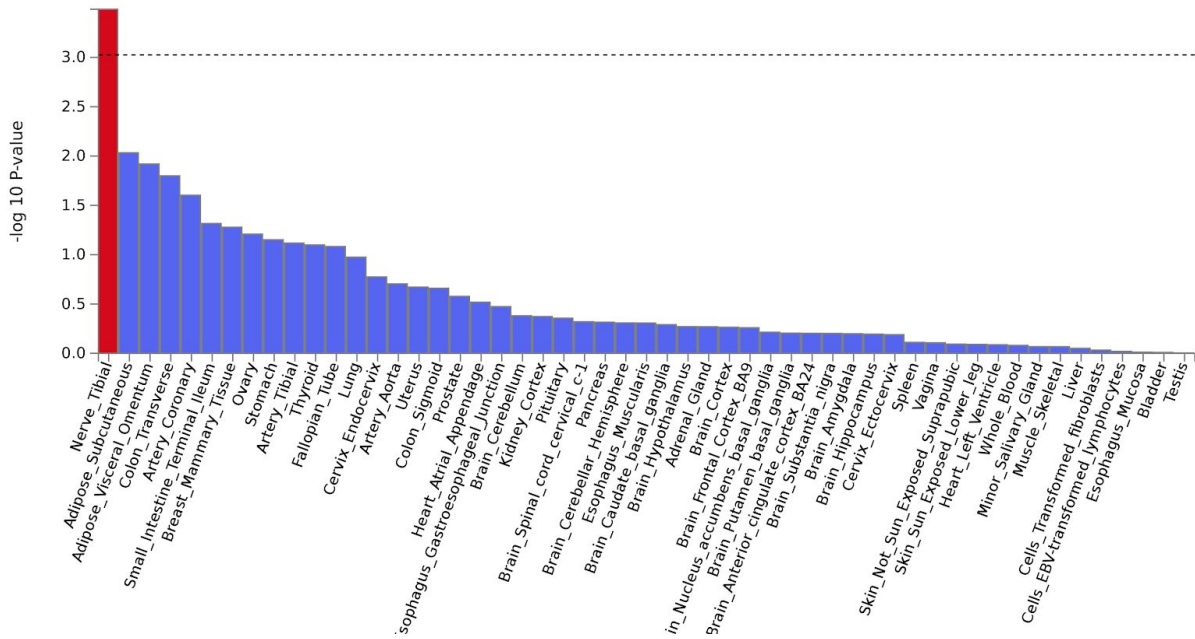

## Supplementary Figure 6: GWAS loci are found nearby to more cardiomyopathy-related genes than expected by chance

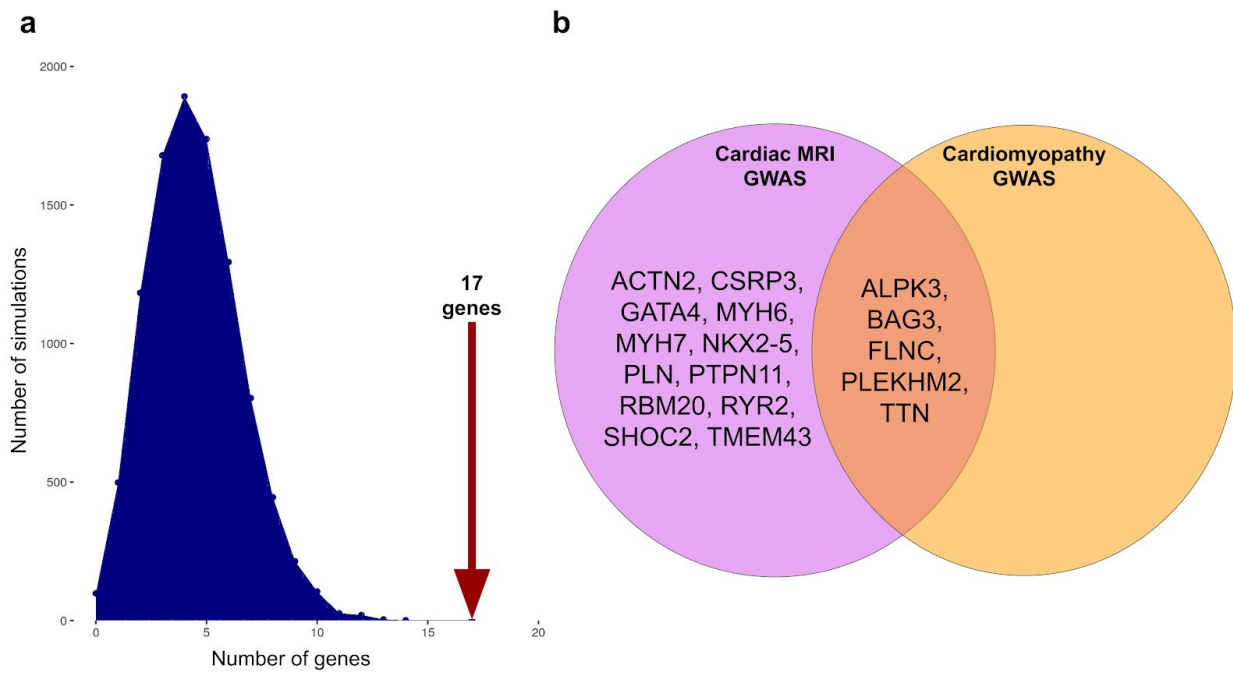

**a.** In 10,000 simulations of SNPs matched to our GWAS lead SNPs in their statistical properties, on average 2 Mendelian cardiomyopathy genes were located within 500kb of those SNPs (range: 0-11 genes). In contrast, 17 Mendelian genes were found within 500kb of the actual SNPs from our study (dotted red vertical line; one-tailed permutation  $P = 1 \times 10^{-4}$ ). **b.** Mendelian cardiomyopathy-related genes from **Supplementary Table 5** found within 500kb of genome-wide significant SNPs associated with cardiomyopathy and cardiac MRI phenotypes are plotted in a Venn diagram. Genes found only near loci discovered in this GWAS of cardiac

MRI phenotypes are located in the pink circle (12 genes); those found only in prior cardiomyopathy GWAS appear in the yellow circle (0 genes); and those found in both are in the overlapping orange area (5 genes).

# Supplementary Figure 7: PheWAS

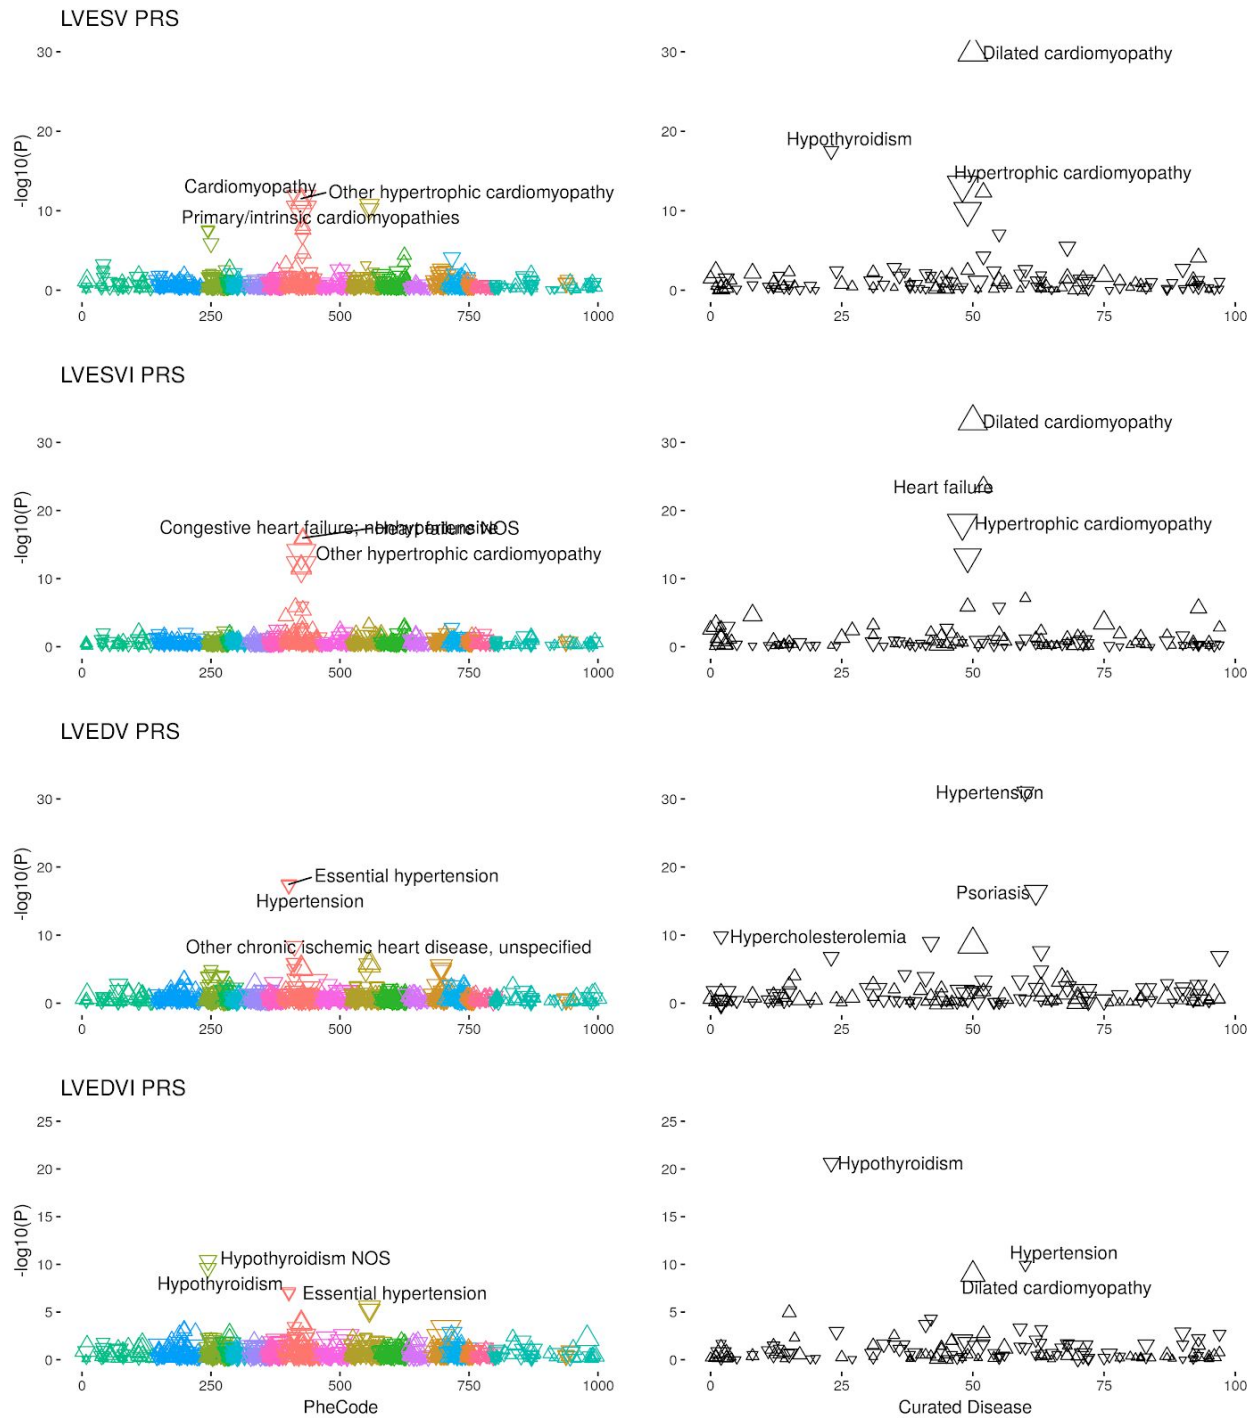



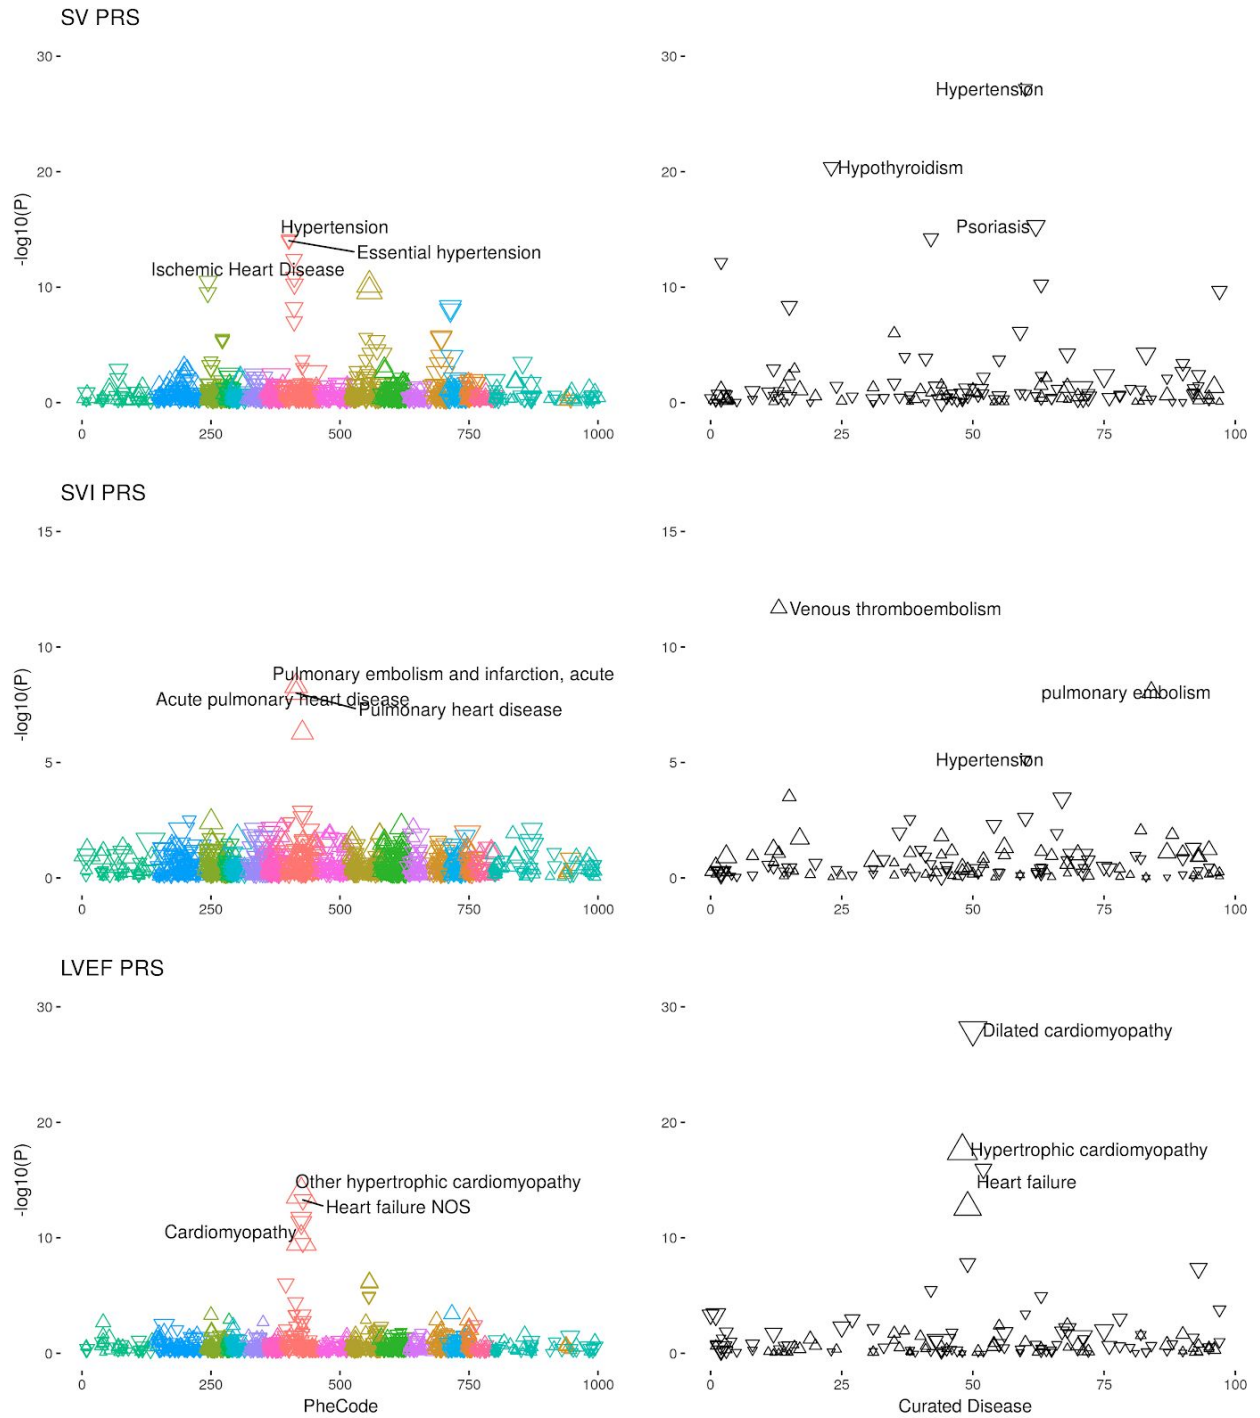

For each of the 7 traits for which a genome-wide association study was performed, the polygenic score was applied to two sets of phenotypes. On the left, colored by PheCode grouping, are PheCode-defined phenotypes. On the right in black-and-white are the curated

disease phenotypes defined in **Supplementary Table 1**. The X-axis is manually defined and arbitrary, though attempts to cluster similar phenotypes. The Y-axis represents the  $-\log_{10}$  of the P-value of association between the polygenic score and the phenotype in a logistic regression model adjusted for age at enrollment, the genotyping array, sex, and the first five principal components of ancestry. The three most strongly associated phenotypes for each group are labeled.

Supplementary Figure 8: SNP effect estimates in the main analysis and in the European-specific analysis

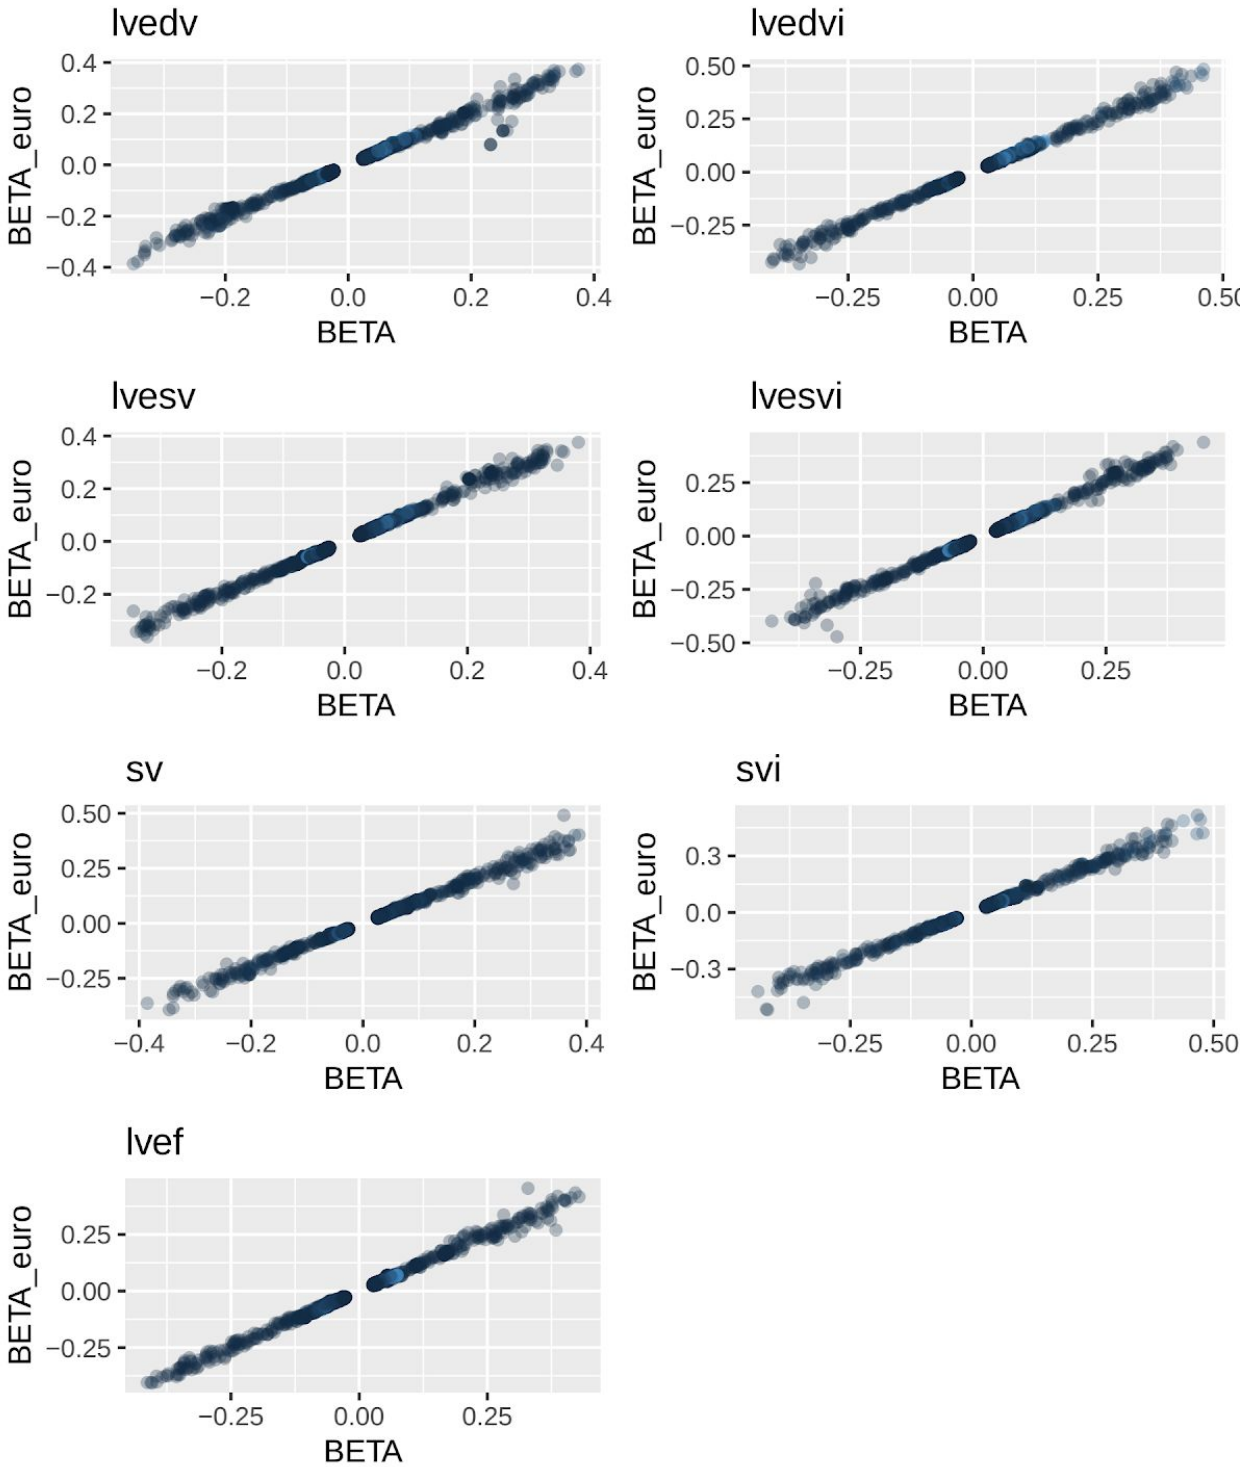

Each point represents one SNP; the X-coordinate represents the SNP's effect estimate in the main analysis (BETA) and the Y-coordinate represents its effect estimate in the European-specific analysis (BETA\_euro). Perfect correlation would be reflected in a line of  $y = x$ . All SNPs with  $P < 5 \times 10^{-5}$  for each trait are plotted.

## Supplementary References

1. Roselli, C. *et al.* Multi-Ethnic Genome-wide Association Study for Atrial Fibrillation. *Nat. Genet.* **50**, 1225–1233 (2018).
2. Bycroft, C. *et al.* The UK Biobank resource with deep phenotyping and genomic data. *Nature* **562**, 203 (2018).
3. Bild, D. E. *et al.* Multi-Ethnic Study of Atherosclerosis: objectives and design. *Am. J. Epidemiol.* **156**, 871–881 (2002).
4. Natarajan, P. *et al.* Deep-coverage whole genome sequences and blood lipids among 16,324 individuals. *Nat. Commun.* **9**, 1–12 (2018).
5. Van der Auwera, G. A. *et al.* From FastQ data to high confidence variant calls: the Genome Analysis Toolkit best practices pipeline. *Curr. Protoc. Bioinforma.* **43**, 11.10.1-33 (2013).
6. Esslinger, U. *et al.* Exome-wide association study reveals novel susceptibility genes to sporadic dilated cardiomyopathy. *PLOS ONE* **12**, e0172995 (2017).
7. Kanai, M. *et al.* Genetic analysis of quantitative traits in the Japanese population links cell types to complex human diseases. *Nat. Genet.* **50**, 390 (2018).
8. Meder, B. *et al.* A genome-wide association study identifies 6p21 as novel risk locus for dilated cardiomyopathy. *Eur. Heart J.* **35**, 1069–1077 (2014).
9. Villard, E. *et al.* A genome-wide association study identifies two loci associated with heart

failure due to dilated cardiomyopathy. *Eur. Heart J.* **32**, 1065–1076 (2011).

10. Wild, P. S. *et al.* Large-scale genome-wide analysis identifies genetic variants associated with cardiac structure and function. *J. Clin. Invest.* **127**, 1798–1812 (2017).
11. Aung Nay *et al.* Genome-Wide Analysis of Left Ventricular Image-Derived Phenotypes Identifies Fourteen Loci Associated With Cardiac Morphogenesis and Heart Failure Development. *Circulation* **140**, 1318–1330 (2019).
